# Supplementary material for: Association of single nucleotide polymorphisms in ITLN1 gene with ischemic stroke risk in Xi’an population, Shaanxi province
Source: PeerJ. 2024 Mar 22;12:e16934. doi: 10.7717/peerj.16934 (PMC10962333; doi:10.7717/peerj.16934)
Supplement: Supplemental Information 2 [file peerj-12-16934-s002.xlsx]

## Sheet: Genotype
Group	rs77824633	rs79209815	rs112656766	rs60429964	rs12094513	rs12091040	rs12094649	rs6427553	rs12094703	rs12091185	rs7411035	rs74547401	rs4656958	rs58170012	rs111321091	rs58615002	rs80262455	rs60721814
Case	T T	T T	T T	G G	G G	T T	G G	C T	G G	T T	G T	C C	A G	C C	A A	A A	A A	G G
Case	C T	T T	C T	C G	A G	A T	A G	C T	A G	C T	G T	C T	G G	C T	A G	A T	A G	C G
Case	T T	T T	T T	G G	G G	T T	G G	T T	G G	T T	T T	C C	G G	C C	A A	A A	A A	G G
Case	T T	T T	T T	G G	G G	T T	G G	T T	G G	T T	T T	C C	G G	C C	A A	A A	A A	G G
Case	T T	T T	T T	G G	G G	T T	G G	T T	G G	T T	T T	C C	G G	C C	A A	A A	A A	G G
Case	T T	T T	T T	G G	G G	T T	G G	C T	G G	T T	G T	C C	A G	C C	A A	A A	A A	G G
Case	T T	T T	T T	G G	G G	T T	G G	T T	G G	T T	T T	C C	G G	C C	A A	A A	A A	G G
Case	T T	T T	T T	G G	G G	T T	G G	C T	G G	T T	G T	C C	A G	C C	A A	A A	A A	G G
Case	T T	T T	T T	G G	G G	T T	G G	T T	G G	T T	T T	C C	G G	C C	A A	A A	A A	G G
Case	C T	C T	T T	C G	A G	A T	A G	C T	A G	C T	G T	C T	G G	C T	A G	A T	A G	C G
Case	C T	T T	C T	C G	A G	A T	A G	C C	A G	C T	G G	C T	A G	C T	A G	A T	A G	C G
Case	C T	T T	C T	C G	A G	A T	A G	C C	A G	C T	G G	C T	A G	C T	A G	A T	A G	C G
Case	C T	C T	T T	C G	A G	A T	A G	C C	A G	C T	G G	C T	A G	C T	A G	A T	A G	C G
Case	C T	T T	C T	C G	A G	A T	A G	C T	A G	C T	G T	C T	G G	C T	A G	A T	A G	C G
Case	T T	T T	T T	G G	G G	T T	G G	T T	G G	T T	T T	C C	G G	C C	A A	A A	A A	G G
Case	T T	T T	T T	G G	G G	T T	G G	T T	G G	T T	T T	C C	A G	C C	A A	A A	A A	G G
Case	T T	T T	T T	G G	G G	T T	G G	C T	G G	T T	G T	C C	A G	C C	A A	A A	A A	G G
Case	C T	C T	T T	C G	A G	A T	A G	C C	A G	C T	G G	C T	A G	C T	A G	A T	A G	C G
Case	T T	T T	T T	G G	G G	T T	G G	T T	G G	T T	T T	C C	G G	C C	A A	A A	A A	G G
Case	T T	T T	T T	G G	G G	T T	G G	C T	G G	T T	G T	C C	A G	C C	A A	A A	A A	G G
Case	C T	T T	C T	C G	A G	A T	A G	C T	A G	C T	G T	C T	G G	C T	A G	A T	A G	C G
Case	T T	T T	T T	G G	G G	T T	G G	C T	G G	T T	G T	C C	A G	C C	A A	A A	A A	G G
Case	T T	T T	T T	G G	G G	T T	G G	T T	G G	T T	T T	C C	A G	C C	A A	A A	A A	G G
Case	T T	T T	T T	G G	G G	T T	G G	C T	G G	T T	G T	C C	A G	C C	A A	A A	A A	G G
Case	C T	T T	C T	C G	A G	A T	A G	C T	A G	C T	G T	C T	G G	C T	A G	A T	A G	C G
Case	T T	T T	T T	G G	G G	T T	G G	C T	G G	T T	G T	C C	A G	C C	A A	A A	A A	G G
Case	C T	C T	T T	C G	A G	A T	A G	C C	A G	C T	G G	C T	A G	C T	A G	A T	A G	C G
Case	T T	T T	T T	G G	G G	T T	G G	T T	G G	T T	T T	C C	G G	C C	A A	A A	A A	G G
Case	T T	T T	T T	G G	G G	T T	G G	C T	G G	T T	G T	C C	A G	C C	A A	A A	A A	G G
Case	C T	T T	C T	C G	A G	A T	A G	C T	A G	C T	G T	C T	G G	C T	A G	A T	A G	C G
Case	C T	C T	T T	C G	A G	A T	A G	C T	A G	C T	G T	C T	A G	C T	A G	A T	A G	C G
Case	T T	T T	T T	G G	G G	T T	G G	T T	G G	T T	T T	C C	G G	C C	A A	A A	A A	G G
Case	T T	T T	T T	G G	G G	T T	G G	C T	G G	T T	G T	C C	A G	C C	A A	A A	A A	G G
Case	T T	T T	T T	G G	G G	T T	G G	T T	G G	T T	T T	C C	G G	C C	A A	A A	A A	G G
Case	C T	C T	T T	C G	A G	A T	A G	C C	A G	C T	G G	C T	A G	C T	A G	A T	A G	C G
Case	T T	T T	T T	G G	G G	T T	G G	T T	G G	T T	T T	C C	G G	C C	A A	A A	A A	G G
Case	T T	T T	T T	G G	G G	T T	G G	T T	G G	T T	T T	C C	G G	C C	A A	A A	A A	G G
Case	T T	T T	T T	G G	G G	T T	G G	C T	G G	T T	G T	C C	A G	C C	A A	A A	A A	G G
Case	T T	T T	T T	G G	G G	T T	G G	C T	G G	T T	G T	C C	A G	C C	A A	A A	A A	G G
Case	C T	C T	T T	C G	A G	A T	A G	C C	A G	C T	G G	C T	A G	C T	A G	A T	A G	C G
Case	C T	C T	T T	C G	A G	A T	A G	C C	A G	C T	G G	C T	A G	C T	A G	A T	A G	C G
Case	T T	T T	T T	G G	G G	T T	G G	T T	G G	T T	T T	C C	G G	C C	A A	A A	A A	G G
Case	C C	T T	C C	C C	A A	A A	A A	C C	A A	C C	G G	T T	G G	T T	G G	T T	G G	C C
Case	T T	T T	T T	G G	G G	T T	G G	C T	G G	T T	G T	C C	A G	C C	A A	A A	A A	G G
Case	C T	T T	C T	C G	A G	A T	A G	C C	A G	C T	G G	C T	A G	C T	A G	A T	A G	C G
Case	T T	T T	T T	G G	G G	T T	G G	C T	G G	T T	G T	C C	A G	C C	A A	A A	A A	G G
Case	T T	T T	T T	G G	G G	T T	G G	C T	G G	T T	G T	C C	A G	C C	A A	A A	A A	G G
Case	T T	T T	T T	G G	G G	T T	G G	T T	G G	T T	T T	C C	G G	C C	A A	A A	A A	G G
Case	T T	T T	T T	G G	G G	T T	G G	C T	G G	T T	G T	C C	A G	C C	A A	A A	A A	G G
Case	C T	C T	T T	C G	A G	A T	A G	C T	A G	C T	G T	C T	G G	C T	A G	A T	A G	C G
Case	T T	T T	T T	G G	G G	T T	G G	T T	G G	T T	T T	C C	G G	C C	A A	A A	A A	G G
Case	C T	C T	T T	C G	A G	A T	A G	C T	A G	C T	G T	C T	G G	C T	A G	A T	A G	C G
Case	T T	T T	T T	G G	G G	T T	G G	C T	G G	T T	G T	C C	A G	C C	A A	A A	A A	G G
Case	T T	T T	T T	G G	G G	T T	G G	T T	G G	T T	T T	C C	G G	C C	A A	A A	A A	G G
Case	T T	T T	T T	G G	G G	T T	G G	C T	G G	T T	G T	C C	A G	C C	A A	A A	A A	G G
Case	T T	T T	T T	G G	G G	T T	G G	T T	G G	T T	T T	C C	G G	C C	A A	A A	A A	G G
Case	C T	C T	T T	C G	A G	A T	A G	C T	A G	C T	G T	C T	G G	C T	A G	A T	A G	C G
Case	C T	C T	T T	C G	A G	A T	A G	C C	A G	C T	G G	C T	A G	C T	A G	A T	A G	C G
Case	T T	T T	T T	G G	G G	T T	G G	C T	G G	T T	G T	C C	A G	C C	A A	A A	A A	G G
Case	T T	T T	T T	G G	G G	T T	G G	C T	G G	T T	G T	C C	A G	C C	A A	A A	A A	G G
Case	C T	C T	T T	C G	A G	A T	A G	C T	A G	C T	G T	C T	G G	C T	A G	A T	A G	C G
Case	T T	T T	T T	G G	G G	T T	G G	T T	G G	T T	T T	C C	G G	C C	A A	A A	A A	G G
Case	C T	T T	C T	C G	A G	A T	A G	C T	A G	C T	G T	C T	G G	C T	A G	A T	A G	C G
Case	T T	T T	T T	G G	G G	T T	G G	C T	G G	T T	G T	C C	A G	C C	A A	A A	A A	G G
Case	T T	T T	T T	G G	G G	T T	G G	C T	G G	T T	G T	C C	A G	C C	A A	A A	A A	G G
Case	T T	T T	T T	G G	G G	T T	G G	C T	G G	T T	G T	C C	A G	C C	A A	A A	A A	G G
Case	T T	T T	T T	G G	G G	T T	G G	C T	G G	T T	G T	C C	A G	C C	A A	A A	A A	G G
Case	T T	T T	T T	G G	G G	T T	G G	C T	G G	T T	G T	C C	A G	C C	A A	A A	A A	G G
Case	T T	T T	T T	G G	G G	T T	G G	T T	G G	T T	T T	C C	G G	C C	A A	A A	A A	G G
Case	T T	T T	T T	G G	G G	T T	G G	T T	G G	T T	T T	C C	G G	C C	A A	A A	A A	G G
Case	T T	T T	T T	G G	G G	T T	G G	T T	G G	T T	T T	C C	G G	C C	A A	A A	A A	G G
Case	T T	T T	T T	G G	G G	T T	G G	T T	G G	T T	T T	C C	G G	C C	A A	A A	A A	G G
Case	T T	T T	T T	G G	G G	T T	G G	T T	G G	T T	T T	C C	G G	C C	A A	A A	A A	G G
Case	T T	T T	T T	G G	G G	T T	G G	C T	G G	T T	G T	C C	A G	C C	A A	A A	A A	G G
Case	T T	T T	T T	G G	G G	T T	G G	C T	G G	T T	G T	C C	A G	C C	A A	A A	A A	G G
Case	C T	T T	C T	C G	A G	A T	A G	C T	A G	C T	G T	C T	G G	C T	A G	A T	A G	C G
Case	T T	T T	T T	G G	G G	T T	G G	C C	G G	T T	G G	C C	A A	C C	A A	A A	A A	G G
Case	T T	T T	T T	G G	G G	T T	G G	C T	G G	T T	G T	C C	A G	C C	A A	A A	A A	G G
Case	C T	C T	T T	C G	A G	A T	A G	C T	A G	C T	G T	C T	G G	C T	A G	A T	A G	C G
Case	C T	T T	C T	C G	A G	A T	A G	C C	A G	C T	G G	C T	A G	C T	A G	A T	A G	C G
Case	T T	T T	T T	G G	G G	T T	G G	C T	G G	T T	G T	C C	A G	C C	A A	A A	A A	G G
Case	T T	T T	T T	G G	G G	T T	G G	T T	G G	T T	T T	C C	G G	C C	A A	A A	A A	G G
Case	C T	T T	C T	C G	A G	A T	A G	C C	A G	C T	G G	C T	A G	C T	A G	A T	A G	C G
Case	C T	T T	C T	C G	A G	A T	A G	C C	A G	C T	G G	C T	A G	C T	A G	A T	A G	C G
Case	T T	T T	T T	G G	G G	T T	G G	C T	G G	T T	G T	C C	A G	C C	A A	A A	A A	G G
Case	T T	T T	T T	G G	G G	T T	G G	T T	G G	T T	T T	C C	G G	C C	A A	A A	A A	G G
Case	T T	T T	T T	G G	G G	T T	G G	T T	G G	T T	T T	C C	G G	C C	A A	A A	A A	G G
Case	T T	T T	T T	G G	G G	T T	G G	T T	G G	T T	T T	C C	G G	C C	A A	A A	A A	G G
Case	T T	T T	T T	G G	G G	T T	G G	C T	G G	T T	G T	C C	A G	C C	A A	A A	A A	G G
Case	T T	T T	T T	G G	G G	T T	G G	T T	G G	T T	T T	C C	G G	C C	A A	A A	A A	G G
Case	C T	C T	T T	C G	A G	A T	A G	C T	A G	C T	G T	C T	G G	C T	A G	A T	A G	C G
Case	T T	T T	T T	G G	G G	T T	G G	T T	G G	T T	T T	C C	G G	C C	A A	A A	A A	G G
Case	C T	T T	C T	C G	A G	A T	A G	C T	A G	C T	G T	C T	G G	C T	A G	A T	A G	C G
Case	T T	T T	T T	G G	G G	T T	G G	C T	G G	T T	G T	C C	A G	C C	A A	A A	A A	G G
Case	T T	T T	T T	G G	G G	T T	G G	C T	G G	T T	G T	C C	A G	C C	A A	A A	A A	G G
Case	T T	T T	T T	G G	G G	T T	G G	T T	G G	0 0	0 0	0 0	G G	0 0	0 0	0 0	0 0	0 0
Case	T T	T T	T T	G G	G G	T T	G G	T T	G G	T T	T T	C C	G G	C C	A A	A A	A A	G G
Case	T T	T T	T T	G G	G G	T T	G G	T T	G G	T T	T T	C C	G G	C C	A A	A A	A A	G G
Case	C T	C T	T T	C G	A G	A T	A G	C T	A G	C T	G T	C T	G G	C T	A G	A T	A G	C G
Case	0 0	T T	0 0	0 0	0 0	0 0	0 0	0 0	0 0	0 0	0 0	0 0	G G	0 0	0 0	0 0	0 0	0 0
Case	T T	T T	T T	G G	G G	T T	G G	C T	G G	T T	G T	C C	A G	C C	A A	A A	A A	G G
Case	C T	T T	C T	C G	A G	A T	A G	C T	A G	C T	G T	C T	G G	C T	A G	A T	A G	C G
Case	T T	T T	T T	G G	G G	T T	G G	C T	G G	T T	G T	C C	A G	C C	A A	A A	A A	G G
Case	T T	T T	T T	G G	G G	T T	G G	C T	G G	T T	G T	C C	A G	C C	A A	A A	A A	G G
Case	C T	C T	T T	C G	A G	A T	A G	C T	A G	C T	G T	C T	G G	C T	A G	A T	A G	C G
Case	T T	T T	T T	G G	G G	T T	G G	T T	G G	T T	T T	C C	G G	C C	A A	A A	A A	G G
Case	T T	T T	T T	G G	G G	T T	G G	T T	G G	T T	T T	C C	G G	C C	A A	A A	A A	G G
Case	T T	T T	T T	G G	G G	T T	G G	T T	G G	T T	T T	C C	G G	C C	A A	A A	A A	G G
Case	T T	T T	T T	G G	G G	T T	G G	T T	G G	T T	T T	C C	G G	C C	A A	A A	A A	G G
Case	T T	T T	T T	G G	G G	T T	G G	T T	G G	T T	T T	C C	G G	C C	A A	A A	A A	G G
Case	T T	T T	T T	G G	G G	T T	G G	T T	G G	T T	T T	C C	G G	C C	A A	A A	A A	G G
Case	T T	T T	T T	G G	G G	T T	G G	C T	G G	T T	G T	C C	A G	C C	A A	A A	A A	G G
Case	C T	C T	T T	C G	A G	A T	A G	C T	A G	C T	G T	C T	G G	C T	A G	A T	A G	C G
Case	T T	T T	T T	G G	G G	T T	G G	T T	G G	T T	T T	C C	G G	C C	A A	A A	A A	G G
Case	C T	C T	T T	C G	A G	A T	A G	C T	A G	C T	G T	C T	G G	C T	A G	A T	A G	C G
Case	T T	T T	T T	G G	G G	T T	G G	C T	G G	T T	G T	C C	A G	C C	A A	A A	A A	G G
Case	T T	T T	T T	G G	G G	T T	G G	C T	G G	T T	G T	C C	A G	C C	A A	A A	A A	G G
Case	T T	T T	T T	G G	G G	T T	G G	T T	G G	T T	T T	C C	G G	C C	A A	A A	A A	G G
Case	C T	C T	T T	C G	A G	A T	A G	C T	A G	C T	G T	C T	G G	C T	A G	A T	A G	C G
Case	T T	T T	T T	G G	G G	T T	G G	T T	G G	T T	T T	C C	G G	C C	A A	A A	A A	G G
Case	T T	T T	T T	G G	G G	T T	G G	T T	G G	T T	T T	C C	G G	C C	A A	A A	A A	G G
Case	T T	T T	T T	G G	G G	T T	G G	C T	G G	T T	G T	C C	A G	C C	A A	A A	A A	G G
Case	T T	T T	T T	G G	G G	T T	G G	C T	G G	T T	G T	C C	A G	C C	A A	A A	A A	G G
Case	T T	T T	T T	G G	G G	T T	G G	C T	G G	T T	G T	C C	A G	C C	A A	A A	A A	G G
Case	C T	C T	T T	C G	A G	A T	A G	C T	A G	C T	G T	C T	G G	C T	A G	A T	A G	C G
Case	T T	T T	T T	G G	G G	T T	G G	T T	G G	T T	T T	C C	G G	C C	A A	A A	A A	G G
Case	T T	T T	T T	G G	G G	T T	G G	C T	G G	T T	G T	C C	A G	C C	A A	A A	A A	G G
Case	T T	T T	T T	G G	G G	T T	G G	C T	G G	T T	G T	C C	A G	C C	A A	A A	A A	G G
Case	C T	C T	T T	C G	A G	A T	A G	C C	A G	C T	G G	C T	A G	C T	A G	A T	A G	C G
Case	C T	C T	T T	C G	A G	A T	A G	C C	A G	C T	G G	C T	A G	C T	A G	A T	A G	C G
Case	C T	C T	T T	C G	A G	A T	A G	C T	A G	C T	G T	C T	G G	C T	A G	A T	A G	C G
Case	C T	C T	T T	C G	A G	A T	A G	C T	A G	C T	G T	C T	G G	C T	A G	A T	A G	C G
Case	C T	T T	C T	C G	A G	A T	A G	C T	A G	C T	G T	C T	G G	C T	A G	A T	A G	C G
Case	T T	T T	T T	G G	G G	T T	G G	T T	G G	T T	T T	C C	G G	C C	A A	A A	A A	G G
Case	T T	T T	T T	G G	G G	T T	G G	C C	G G	T T	G G	C C	A A	C C	A A	A A	A A	G G
Case	T T	T T	T T	G G	G G	T T	G G	C T	G G	T T	G T	C C	A G	C C	A A	A A	A A	G G
Case	T T	T T	T T	G G	G G	T T	G G	T T	G G	T T	T T	C C	G G	C C	A A	A A	A A	G G
Case	T T	T T	T T	G G	G G	T T	G G	T T	G G	T T	T T	C C	G G	C C	A A	A A	A A	G G
Case	T T	T T	T T	G G	G G	T T	G G	T T	G G	T T	T T	C C	G G	C C	A A	A A	A A	G G
Case	T T	T T	T T	G G	G G	T T	G G	T T	G G	T T	T T	C C	G G	C C	A A	A A	A A	G G
Case	T T	T T	T T	G G	G G	T T	G G	C T	G G	T T	G T	C C	A G	C C	A A	A A	A A	G G
Case	T T	T T	T T	G G	G G	T T	G G	T T	G G	T T	T T	C C	G G	C C	A A	A A	A A	G G
Case	T T	T T	T T	G G	G G	T T	G G	T T	G G	T T	T T	C C	G G	C C	A A	A A	A A	G G
Case	T T	T T	T T	G G	G G	T T	G G	T T	G G	T T	T T	C C	G G	C C	A A	A A	A A	G G
Case	T T	T T	T T	G G	G G	T T	G G	T T	G G	T T	T T	C C	G G	C C	A A	A A	A A	G G
Case	T T	T T	T T	G G	G G	T T	G G	C T	G G	T T	G T	C C	A G	C C	A A	A A	A A	G G
Case	T T	T T	T T	G G	G G	T T	G G	T T	G G	T T	T T	C C	G G	C C	A A	A A	A A	G G
Case	T T	T T	T T	G G	G G	T T	G G	C T	G G	T T	G T	C C	A G	C C	A A	A A	A A	G G
Case	T T	T T	T T	G G	G G	T T	G G	T T	G G	T T	T T	C C	G G	C C	A A	A A	A A	G G
Case	C T	C T	T T	C G	A G	A T	A G	C T	A G	C T	G T	C T	G G	C T	A G	A T	A G	C G
Case	T T	T T	T T	G G	G G	T T	G G	T T	G G	T T	T T	C C	G G	C C	A A	A A	A A	G G
Case	T T	T T	T T	G G	G G	T T	G G	T T	G G	T T	T T	C C	G G	C C	A A	A A	A A	G G
Case	T T	T T	T T	G G	G G	T T	G G	T T	G G	T T	T T	C C	G G	C C	A A	A A	A A	G G
Case	T T	T T	T T	G G	G G	T T	G G	T T	G G	T T	T T	C C	G G	C C	A A	A A	A A	G G
Case	0 0	T T	0 0	0 0	0 0	0 0	0 0	0 0	0 0	0 0	0 0	0 0	G G	0 0	0 0	0 0	0 0	0 0
Case	T T	T T	T T	G G	G G	T T	G G	T T	G G	T T	T T	C C	G G	C C	A A	A A	A A	G G
Case	T T	T T	T T	G G	G G	T T	G G	T T	G G	T T	T T	C C	G G	C C	A A	A A	A A	G G
Case	C T	C T	T T	C G	A G	A T	A G	C T	A G	C T	G T	C T	G G	C T	A G	A T	A G	C G
Case	T T	T T	T T	G G	G G	T T	G G	T T	G G	T T	T T	C C	G G	C C	A A	A A	A A	G G
Case	C T	C T	T T	C G	A G	A T	A G	C T	A G	C T	G T	C T	G G	C T	A G	A T	A G	C G
Case	T T	T T	T T	G G	G G	T T	G G	C T	G G	T T	G T	C C	A G	C C	A A	A A	A A	G G
Case	T T	T T	T T	G G	G G	T T	G G	C C	G G	T T	G G	C C	A A	C C	A A	A A	A A	G G
Case	C T	T T	C T	C G	A G	A T	A G	C C	A G	C T	G G	C T	A G	C T	A G	A T	A G	C G
Case	C C	C C	T T	C C	A A	A A	A A	C C	A A	C C	G G	T T	G G	T T	G G	T T	G G	C C
Case	C T	C T	T T	C G	A G	A T	A G	C C	A G	C T	G G	C T	A G	C T	A G	A T	A G	C G
Case	T T	T T	T T	G G	G G	T T	G G	T T	G G	T T	T T	C C	G G	C C	A A	A A	A A	G G
Case	T T	T T	T T	G G	G G	T T	G G	T T	G G	T T	T T	C C	G G	C C	A A	A A	A A	G G
Case	T T	T T	T T	G G	G G	T T	G G	T T	G G	T T	T T	C C	G G	C C	A A	A A	A A	G G
Case	T T	T T	T T	G G	G G	T T	G G	C T	G G	T T	G T	C C	A G	C C	A A	A A	A A	G G
Case	T T	T T	T T	G G	G G	T T	G G	T T	G G	T T	T T	C C	G G	C C	A A	A A	A A	G G
Case	T T	T T	T T	G G	G G	T T	G G	C T	G G	T T	G T	C C	A G	C C	A A	A A	A A	G G
Case	T T	T T	T T	G G	G G	T T	G G	C T	G G	T T	G T	C C	A G	C C	A A	A A	A A	G G
Case	T T	T T	T T	G G	G G	T T	G G	T T	G G	T T	T T	C C	G G	C C	A A	A A	A A	G G
Case	T T	T T	T T	G G	G G	T T	G G	T T	G G	T T	T T	C C	G G	C C	A A	A A	A A	G G
Case	T T	T T	T T	G G	G G	T T	G G	C T	G G	T T	G T	C C	A G	C C	A A	A A	A A	G G
Case	T T	T T	T T	G G	G G	T T	G G	C T	G G	T T	G T	C C	A G	C C	A A	A A	A A	G G
Case	T T	T T	T T	G G	G G	T T	G G	T T	G G	T T	T T	C C	G G	C C	A A	A A	A A	G G
Case	T T	T T	T T	G G	G G	T T	G G	C T	G G	T T	G T	C C	A G	C C	A A	A A	A A	G G
Case	C T	C T	T T	C G	A G	A T	A G	C C	A G	C T	G G	C T	A G	C T	A G	A T	A G	C G
Case	T T	T T	T T	G G	G G	T T	G G	T T	G G	T T	T T	C C	G G	C C	A A	A A	A A	G G
Case	T T	T T	T T	G G	G G	T T	G G	T T	G G	T T	T T	C C	G G	C C	A A	A A	A A	G G
Case	C T	C T	T T	C G	A G	A T	A G	C T	A G	C T	G T	C T	G G	C T	A G	A T	A G	C G
Case	T T	T T	T T	G G	G G	T T	G G	T T	G G	T T	T T	C C	G G	C C	A A	A A	A A	G G
Case	T T	T T	T T	G G	G G	T T	G G	C T	G G	T T	G T	C C	A G	C C	A A	A A	A A	G G
Case	T T	T T	T T	G G	G G	T T	G G	C T	G G	T T	G T	C C	A G	C C	A A	A A	A A	G G
Case	T T	T T	T T	G G	G G	T T	G G	C T	G G	T T	G T	C C	A G	C C	A A	A A	A A	G G
Case	C C	C C	T T	C C	A A	A A	A A	C C	A A	C C	G G	T T	G G	T T	G G	T T	G G	C C
Case	T T	T T	T T	G G	G G	T T	G G	C T	G G	T T	G T	C C	A G	C C	A A	A A	A A	G G
Case	C T	C T	T T	C G	A G	A T	A G	C T	A G	C T	G T	C T	G G	C T	A G	A T	A G	C G
Case	C T	C T	T T	C G	A G	A T	A G	C T	A G	C T	G T	C T	G G	C T	A G	A T	A G	C G
Case	T T	T T	T T	G G	G G	T T	G G	C T	G G	T T	G T	C C	A G	C C	A A	A A	A A	G G
Case	T T	T T	T T	G G	G G	T T	G G	T T	G G	T T	T T	C C	G G	C C	A A	A A	A A	G G
Case	C T	T T	C T	C G	A G	A T	A G	C T	A G	C T	G T	C T	G G	C T	A G	A T	A G	C G
Case	T T	T T	T T	G G	G G	T T	G G	T T	G G	T T	T T	C C	G G	C C	A A	A A	A A	G G
Case	T T	T T	T T	G G	G G	T T	G G	T T	G G	T T	T T	C C	G G	C C	A A	A A	A A	G G
Case	T T	T T	T T	G G	G G	T T	G G	T T	G G	T T	T T	C C	G G	C C	A A	A A	A A	G G
Case	T T	T T	T T	G G	G G	T T	G G	C T	G G	T T	G T	C C	A G	C C	A A	A A	A A	G G
Case	C T	C T	T T	C G	A G	A T	A G	C T	A G	C T	G T	C T	G G	C T	A G	A T	A G	C G
Case	T T	T T	T T	G G	G G	T T	G G	C T	G G	T T	G T	C C	A G	C C	A A	A A	A A	G G
Case	T T	T T	T T	G G	G G	T T	G G	C T	G G	T T	G T	C C	A G	C C	A A	A A	A A	G G
Case	T T	T T	T T	G G	G G	T T	G G	T T	G G	T T	T T	C C	G G	C C	A A	A A	A A	G G
Case	T T	T T	T T	G G	G G	T T	G G	T T	G G	T T	T T	C C	G G	C C	A A	A A	A A	G G
Case	T T	T T	T T	G G	G G	T T	G G	C T	G G	T T	G T	C C	A G	C C	A A	A A	A A	G G
Case	C T	C T	T T	C G	A G	A T	A G	C T	A G	C T	G T	C T	G G	C T	A G	A T	A G	C G
Case	T T	T T	T T	G G	G G	T T	G G	T T	G G	T T	T T	C C	G G	C C	A A	A A	A A	G G
Case	T T	T T	T T	G G	G G	T T	G G	T T	G G	T T	T T	C C	G G	C C	A A	A A	A A	G G
Case	T T	T T	T T	G G	G G	T T	G G	T T	G G	T T	T T	C C	A G	C C	A A	A A	A A	G G
Case	T T	T T	T T	G G	G G	T T	G G	C T	G G	T T	G T	C C	A G	C C	A A	A A	A A	G G
Case	C T	T T	C T	C G	A G	A T	A G	C T	A G	C T	G T	C T	G G	C T	A G	A T	A G	C G
Case	T T	T T	T T	G G	G G	T T	G G	C T	G G	T T	G T	C C	A G	C C	A A	A A	A A	G G
Case	T T	T T	T T	G G	G G	T T	G G	T T	G G	T T	T T	C C	G G	C C	A A	A A	A A	G G
Case	T T	T T	T T	G G	G G	T T	G G	C T	G G	T T	G T	C C	A G	C C	A A	A A	A A	G G
Case	T T	T T	T T	G G	G G	T T	G G	C T	G G	T T	G T	C C	A G	C C	A A	A A	A A	G G
Case	C T	C T	T T	C G	A G	A T	A G	C T	A G	C T	G T	C T	G G	C T	A G	A T	A G	C G
Case	T T	T T	T T	G G	G G	T T	G G	C T	G G	T T	G T	C C	A G	C C	A A	A A	A A	G G
Case	T T	T T	T T	G G	G G	T T	G G	T T	G G	T T	T T	C C	G G	C C	A A	A A	A A	G G
Case	C T	C T	T T	C G	A G	A T	A G	C T	A G	C T	G T	C T	G G	C T	A G	A T	A G	C G
Case	T T	T T	T T	G G	G G	T T	G G	T T	G G	T T	T T	C C	G G	C C	A A	A A	A A	G G
Case	T T	T T	T T	G G	G G	T T	G G	C T	G G	T T	G T	C C	A G	C C	A A	A A	A A	G G
Case	T T	T T	T T	G G	G G	T T	G G	T T	G G	T T	T T	C C	G G	C C	A A	A A	A A	G G
Case	T T	T T	T T	G G	G G	T T	G G	C T	G G	T T	G T	C C	A G	C C	A A	A A	A A	G G
Case	C T	C T	T T	C G	A G	A T	A G	C C	A G	C T	G G	C T	A G	C T	A G	A T	A G	C G
Case	C T	T T	C T	C G	A G	A T	A G	C T	A G	C T	G T	C T	G G	C T	A G	A T	A G	C G
Case	T T	T T	T T	G G	G G	T T	G G	T T	G G	T T	T T	C C	G G	C C	A A	A A	A A	G G
Case	C T	C T	T T	C G	A G	A T	A G	C T	A G	C T	G T	C T	G G	C T	A G	A T	A G	C G
Case	T T	T T	T T	G G	G G	T T	G G	T T	G G	T T	T T	C C	G G	C C	A A	A A	A A	G G
Case	C T	T T	C T	C G	A G	A T	A G	C C	A G	C T	G G	C T	A G	C T	A G	A T	A G	C G
Case	C C	C C	T T	C C	A A	A A	A A	C C	A A	C C	G G	T T	G G	T T	G G	T T	G G	C C
Case	T T	T T	T T	G G	G G	T T	G G	C T	G G	T T	G T	C C	A G	C C	A A	A A	A A	G G
Case	T T	T T	T T	G G	G G	T T	G G	C T	G G	T T	G T	C C	A G	C C	A A	A A	A A	G G
Case	T T	T T	T T	G G	G G	T T	G G	T T	G G	T T	T T	C C	G G	C C	A A	A A	A A	G G
Case	T T	T T	T T	G G	G G	T T	G G	T T	G G	T T	T T	C C	G G	C C	A A	A A	A A	G G
Case	T T	T T	T T	G G	G G	T T	G G	C T	G G	T T	G T	C C	A G	C C	A A	A A	A A	G G
Case	T T	T T	T T	G G	G G	T T	G G	C T	G G	T T	G T	C C	A G	C C	A A	A A	A A	G G
Case	T T	T T	T T	G G	G G	T T	G G	T T	G G	T T	T T	C C	G G	C C	A A	A A	A A	G G
Case	T T	T T	T T	G G	G G	T T	G G	T T	G G	T T	T T	C C	G G	C C	A A	A A	A A	G G
Case	T T	T T	T T	G G	G G	T T	G G	T T	G G	T T	T T	C C	G G	C C	A A	A A	A A	G G
Case	T T	T T	T T	G G	G G	T T	G G	T T	G G	T T	T T	C C	G G	C C	A A	A A	A A	G G
Case	T T	T T	T T	G G	G G	T T	G G	C C	G G	T T	G G	C C	A A	C C	A A	A A	A A	G G
Case	T T	T T	T T	G G	G G	T T	G G	C T	G G	T T	G T	C C	A G	C C	A A	A A	A A	G G
Case	T T	T T	T T	G G	G G	T T	G G	C T	G G	T T	G T	C C	A G	C C	A A	A A	A A	G G
Case	T T	T T	T T	G G	G G	T T	G G	C T	G G	T T	G T	C C	A G	C C	A A	A A	A A	G G
Case	C T	C T	T T	C G	A G	A T	A G	C T	A G	C T	G T	C T	G G	C T	A G	A T	A G	C G
Case	C T	T T	C T	C G	A G	A T	A G	C T	A G	C T	G T	C T	G G	C T	A G	A T	A G	C G
Case	T T	T T	T T	G G	G G	T T	G G	C T	G G	T T	G T	C C	A G	C C	A A	A A	A A	G G
Case	T T	T T	T T	G G	G G	T T	G G	C T	G G	T T	G T	C C	A G	C C	A A	A A	A A	G G
Case	T T	T T	T T	G G	G G	T T	G G	C T	G G	T T	G T	C C	A G	C C	A A	A A	A A	G G
Case	T T	T T	T T	G G	G G	T T	G G	C T	G G	T T	G T	C C	A G	C C	A A	A A	A A	G G
Case	T T	T T	T T	G G	G G	T T	G G	C T	G G	T T	G T	C C	A G	C C	A A	A A	A A	G G
Case	T T	T T	T T	G G	G G	T T	G G	C T	G G	T T	G T	C C	A G	C C	A A	A A	A A	G G
Case	C T	T T	C T	C G	A G	A T	A G	C C	A G	C T	G G	C T	A G	C T	A G	A T	A G	C G
Case	T T	T T	T T	G G	G G	T T	G G	C T	G G	T T	G T	C C	A G	C C	A A	A A	A A	G G
Case	C T	C T	T T	C G	A G	A T	A G	C T	A G	C T	G T	C T	G G	C T	A G	A T	A G	C G
Case	T T	T T	T T	G G	G G	T T	G G	C T	G G	T T	G T	C C	A G	C C	A A	A A	A A	G G
Case	T T	T T	T T	G G	G G	T T	G G	T T	G G	T T	T T	C C	G G	C C	A A	A A	A A	G G
Case	T T	T T	T T	G G	G G	T T	G G	C T	G G	T T	G T	C C	A G	C C	A A	A A	A A	G G
Case	T T	T T	T T	G G	G G	T T	G G	C T	G G	T T	G T	C C	A G	C C	A A	A A	A A	G G
Case	C T	C T	T T	C G	A G	A T	A G	C T	A G	C T	G T	C T	G G	C T	A G	A T	A G	C G
Case	T T	T T	T T	G G	G G	T T	G G	T T	G G	T T	T T	C C	G G	C C	A A	A A	A A	G G
Case	C T	T T	C T	C G	A G	A T	A G	C T	A G	C T	G T	C T	G G	C T	A G	A T	A G	C G
Case	C C	C C	T T	C C	A A	A A	A A	C C	A A	C C	G G	T T	G G	T T	G G	T T	G G	C C
Case	T T	T T	T T	G G	G G	T T	G G	C T	G G	T T	G T	C C	A G	C C	A A	A A	A A	G G
Case	T T	T T	T T	G G	G G	T T	G G	C T	G G	T T	G T	C C	A G	C C	A A	A A	A A	G G
Case	T T	T T	T T	G G	G G	T T	G G	T T	G G	T T	T T	C C	G G	C C	A A	A A	A A	G G
Case	T T	T T	T T	G G	G G	T T	G G	C T	G G	T T	G T	C C	A G	C C	A A	A A	A A	G G
Case	T T	T T	T T	G G	G G	T T	G G	T T	G G	T T	T T	C C	G G	C C	A A	A A	A A	G G
Case	T T	T T	T T	G G	G G	T T	G G	C T	G G	T T	G T	C C	A G	C C	A A	A A	A A	G G
Case	T T	T T	T T	G G	G G	T T	G G	T T	G G	T T	T T	C C	G G	C C	A A	A A	A A	G G
Case	T T	T T	T T	G G	G G	T T	G G	C T	G G	T T	G T	C C	A G	C C	A A	A A	A A	G G
Case	C T	T T	C T	C G	A G	A T	A G	C T	A G	C T	G T	C T	G G	C T	A G	A T	A G	C G
Case	T T	T T	T T	G G	G G	T T	G G	C T	G G	T T	G T	C C	A G	C C	A A	A A	A A	G G
Case	T T	T T	T T	G G	G G	T T	G G	C T	G G	T T	G T	C C	A G	C C	A A	A A	A A	G G
Case	T T	T T	T T	G G	G G	T T	G G	C T	G G	T T	G T	C C	A G	C C	A A	A A	A A	G G
Case	T T	T T	T T	G G	G G	T T	G G	C T	G G	T T	G T	C C	A G	C C	A A	A A	A A	G G
Case	T T	T T	T T	G G	G G	T T	G G	C T	G G	T T	G T	C C	A G	C C	A A	A A	A A	G G
Case	T T	T T	T T	G G	G G	T T	G G	T T	G G	T T	T T	C C	G G	C C	A A	A A	A A	G G
Case	C T	C T	T T	C G	A G	A T	A G	C T	A G	C T	G T	C T	G G	C T	A G	A T	A G	C G
Case	T T	T T	T T	G G	G G	T T	G G	C T	G G	T T	G T	C C	A G	C C	A A	A A	A A	G G
Case	T T	T T	T T	G G	G G	T T	G G	T T	G G	T T	T T	C C	G G	C C	A A	A A	A A	G G
Case	T T	T T	T T	G G	G G	T T	G G	T T	G G	T T	T T	C C	G G	C C	A A	A A	A A	G G
Case	T T	T T	T T	G G	G G	T T	G G	T T	G G	T T	T T	C C	G G	C C	A A	A A	A A	G G
Case	C T	C T	T T	C G	A G	A T	A G	C C	A G	C T	G G	C T	A G	C T	A G	A T	A G	C G
Case	T T	T T	T T	G G	G G	T T	G G	T T	G G	T T	T T	C C	G G	C C	A A	A A	A A	G G
Case	C T	C T	T T	C G	A G	A T	A G	C T	A G	C T	G T	C T	G G	C T	A G	A T	A G	C G
Case	C T	T T	C T	C G	A G	A T	A G	C C	A G	C T	G G	C T	A G	C T	A G	A T	A G	C G
Case	C T	T T	C T	C G	A G	A T	A G	C C	A G	C T	G G	C T	A G	C T	A G	A T	A G	C G
Case	C T	T T	C T	C G	A G	A T	A G	C C	A G	C T	G G	C T	A G	C T	A G	A T	A G	C G
Case	C T	C T	T T	C G	A G	A T	A G	C T	A G	C T	G T	C T	G G	C T	A G	A T	A G	C G
Case	T T	T T	T T	G G	G G	T T	G G	C T	G G	T T	G T	C C	A G	C C	A A	A A	A A	G G
Case	T T	T T	T T	G G	G G	T T	G G	T T	G G	T T	T T	C C	G G	C C	A A	A A	A A	G G
Case	T T	T T	T T	G G	G G	T T	G G	T T	G G	T T	T T	C C	G G	C C	A A	A A	A A	G G
Case	T T	T T	T T	G G	G G	T T	G G	T T	G G	T T	T T	C C	G G	C C	A A	A A	A A	G G
Case	T T	T T	T T	G G	G G	T T	G G	C T	G G	T T	G T	C C	A G	C C	A A	A A	A A	G G
Case	T T	T T	T T	G G	G G	T T	G G	T T	G G	T T	T T	C C	G G	C C	A A	A A	A A	G G
Case	T T	T T	T T	G G	G G	T T	G G	T T	G G	T T	T T	C C	G G	C C	A A	A A	A A	G G
Case	T T	T T	T T	G G	G G	T T	G G	C T	G G	T T	G T	C C	A G	C C	A A	A A	A A	G G
Case	T T	T T	T T	G G	G G	T T	G G	T T	G G	T T	T T	C C	G G	C C	A A	A A	A A	G G
Case	T T	T T	T T	G G	G G	T T	G G	C C	G G	T T	G G	C C	A A	C C	A A	A A	A A	G G
Case	T T	T T	T T	G G	G G	T T	G G	T T	G G	T T	T T	C C	G G	C C	A A	A A	A A	G G
Case	C T	T T	C T	C G	A G	A T	A G	C T	A G	C T	G T	C T	G G	C T	A G	A T	A G	C G
Case	C T	C T	T T	C G	A G	A T	A G	C T	A G	C T	G T	C T	G G	C T	A G	A T	A G	C G
Case	C T	T T	C T	C G	A G	A T	A G	C T	A G	C T	G T	C T	G G	C T	A G	A T	A G	C G
Case	T T	T T	T T	G G	G G	T T	G G	C T	G G	T T	G T	C C	A G	C C	A A	A A	A A	G G
Case	T T	T T	T T	G G	G G	T T	G G	T T	G G	T T	T T	C C	G G	C C	A A	A A	A A	G G
Case	C T	T T	C T	C G	A G	A T	A G	C T	A G	C T	G T	C T	G G	C T	A G	A T	A G	C G
Case	C T	C T	T T	C G	A G	A T	A G	C T	A G	C T	G T	C T	G G	C T	A G	A T	A G	C G
Case	T T	T T	T T	G G	G G	T T	G G	C C	G G	T T	G G	C C	A A	C C	A A	A A	A A	G G
Case	T T	T T	T T	G G	G G	T T	G G	T T	G G	T T	T T	C C	G G	C C	A A	A A	A A	G G
Case	T T	T T	T T	G G	G G	T T	G G	T T	G G	T T	T T	C C	G G	C C	A A	A A	A A	G G
Case	T T	T T	T T	G G	G G	T T	G G	C T	G G	T T	G T	C C	A G	C C	A A	A A	A A	G G
Case	T T	T T	T T	G G	G G	T T	G G	T T	G G	T T	T T	C C	G G	C C	A A	A A	A A	G G
Case	C T	T T	C T	C G	A G	A T	A G	C C	A G	C T	G G	C T	A G	C T	A G	A T	A G	C G
Case	T T	T T	T T	G G	G G	T T	G G	T T	G G	T T	T T	C C	G G	C C	A A	A A	A A	G G
Case	T T	T T	T T	G G	G G	T T	G G	C T	G G	T T	G T	C C	A G	C C	A A	A A	A A	G G
Case	T T	T T	T T	G G	G G	T T	G G	C T	G G	T T	G T	C C	A G	C C	A A	A A	A A	G G
Case	T T	T T	T T	G G	G G	T T	G G	C T	G G	T T	G T	C C	A G	C C	A A	A A	A A	G G
Case	T T	T T	T T	G G	G G	T T	G G	T T	G G	T T	T T	C C	G G	C C	A A	A A	A A	G G
Case	T T	T T	T T	G G	G G	T T	G G	T T	G G	T T	T T	C C	G G	C C	A A	A A	A A	G G
Case	T T	T T	T T	G G	G G	T T	G G	C T	G G	T T	G T	C C	A G	C C	A A	A A	A A	G G
Case	T T	T T	T T	G G	G G	T T	G G	C T	G G	T T	G T	C C	A G	C C	A A	A A	A A	G G
Case	T T	T T	T T	G G	G G	T T	G G	T T	G G	T T	T T	C C	G G	C C	A A	A A	A A	G G
Case	T T	T T	T T	G G	G G	T T	G G	C T	G G	T T	G T	C C	A G	C C	A A	A A	A A	G G
Case	C T	T T	C T	C G	A G	A T	A G	C T	A G	C T	G T	C T	G G	C T	A G	A T	A G	C G
Case	T T	T T	T T	G G	G G	T T	G G	C T	G G	T T	G T	C C	A G	C C	A A	A A	A A	G G
Case	T T	T T	T T	G G	G G	T T	G G	C T	G G	T T	G T	C C	A G	C C	A A	A A	A A	G G
Case	C T	C T	T T	C G	A G	A T	A G	C C	A G	C T	G G	C T	A G	C T	A G	A T	A G	C G
Case	T T	T T	T T	G G	G G	T T	G G	T T	G G	T T	T T	C C	G G	C C	A A	A A	A A	G G
Case	C T	C T	T T	C G	A G	A T	A G	C T	A G	C T	G T	C T	G G	C T	A G	A T	A G	C G
Case	C T	C T	T T	C G	A G	A T	A G	C T	A G	C T	G T	C T	G G	C T	A G	A T	A G	C G
Case	T T	T T	T T	G G	G G	T T	G G	C T	G G	T T	G T	C C	A G	C C	A A	A A	A A	G G
Case	T T	T T	T T	G G	G G	T T	G G	T T	G G	T T	T T	C C	G G	C C	A A	A A	A A	G G
Case	T T	T T	T T	G G	G G	T T	G G	T T	G G	T T	T T	C C	G G	C C	A A	A A	A A	G G
Case	T T	T T	T T	G G	G G	T T	G G	T T	G G	T T	T T	C C	G G	C C	A A	A A	A A	G G
Case	C T	T T	C T	C G	A G	A T	A G	C T	A G	C T	G T	C T	G G	C T	A G	A T	A G	C G
Case	C T	C T	T T	C G	A G	A T	A G	C C	A G	C T	G G	C T	A G	C T	A G	A T	A G	C G
Case	T T	T T	T T	G G	G G	T T	G G	T T	G G	T T	T T	C C	G G	C C	A A	A A	A A	G G
Case	C T	C T	T T	C G	A G	A T	A G	C C	A G	C T	G G	C T	A G	C T	A G	A T	A G	C G
Case	T T	T T	T T	G G	G G	T T	G G	C C	G G	T T	G G	C C	A A	C C	A A	A A	A A	G G
Case	T T	T T	T T	G G	G G	T T	G G	T T	G G	T T	T T	C C	G G	C C	A A	A A	A A	G G
Case	C T	T T	C T	C G	A G	A T	A G	C T	A G	C T	G T	C T	G G	C T	A G	A T	A G	C G
Case	T T	T T	T T	G G	G G	T T	G G	T T	G G	T T	T T	C C	G G	C C	A A	A A	A A	G G
Case	T T	T T	T T	G G	G G	T T	G G	C T	G G	T T	G T	C C	A G	C C	A A	A A	A A	G G
Case	T T	T T	T T	G G	G G	T T	G G	C T	G G	T T	G T	C C	A G	C C	A A	A A	A A	G G
Case	T T	T T	T T	G G	G G	T T	G G	C T	G G	T T	G T	C C	A G	C C	A A	A A	A A	G G
Case	C T	C T	T T	C G	A G	A T	A G	C T	A G	C T	G T	C T	G G	C T	A G	A T	A G	C G
Case	T T	T T	T T	G G	G G	T T	G G	T T	G G	T T	T T	C C	G G	C C	A A	A A	A A	G G
Case	T T	T T	T T	G G	G G	T T	G G	T T	G G	T T	T T	C C	G G	C C	A A	A A	A A	G G
Case	T T	T T	T T	G G	G G	T T	G G	C T	G G	T T	G T	C C	A G	C C	A A	A A	A A	G G
Case	T T	T T	T T	G G	G G	T T	G G	T T	G G	T T	T T	C C	G G	C C	A A	A A	A A	G G
Case	C T	C T	T T	C G	A G	A T	A G	C T	A G	C T	G T	C T	G G	C T	A G	A T	A G	C G
Case	C T	C T	T T	C G	A G	A T	A G	C C	A G	C T	G G	C T	A G	C T	A G	A T	A G	C G
Case	C T	C T	T T	C G	A G	A T	A G	C T	A G	C T	G T	C T	G G	C T	A G	A T	A G	C G
Case	T T	T T	T T	G G	G G	T T	G G	T T	G G	T T	T T	C C	G G	C C	A A	A A	A A	G G
Case	T T	T T	T T	G G	G G	T T	G G	T T	G G	T T	T T	C C	G G	C C	A A	A A	A A	G G
Case	T T	T T	T T	G G	G G	T T	G G	C T	G G	T T	G T	C C	A G	C C	A A	A A	A A	G G
Case	C T	T T	C T	C G	A G	A T	A G	C T	A G	C T	G T	C T	G G	C T	A G	A T	A G	C G
Case	T T	T T	T T	G G	G G	T T	G G	C T	G G	T T	G T	C C	A G	C C	A A	A A	A A	G G
Case	T T	T T	T T	G G	G G	T T	G G	T T	G G	T T	T T	C C	G G	C C	A A	A A	A A	G G
Case	T T	T T	T T	G G	G G	T T	G G	C T	G G	T T	G T	C C	A G	C C	A A	A A	A A	G G
Case	T T	T T	T T	G G	G G	T T	G G	C T	G G	T T	G T	C C	A G	C C	A A	A A	A A	G G
Case	T T	T T	T T	G G	G G	T T	G G	T T	G G	T T	T T	C C	G G	C C	A A	A A	A A	G G
Case	C T	C T	T T	C G	A G	A T	A G	C T	A G	C T	G T	C T	G G	C T	A G	A T	A G	C G
Case	T T	T T	T T	G G	G G	T T	G G	C T	G G	T T	G T	C C	A G	C C	A A	A A	A A	G G
Case	T T	T T	T T	G G	G G	T T	G G	T T	G G	T T	T T	C C	G G	C C	A A	A A	A A	G G
Case	T T	T T	T T	G G	G G	T T	G G	T T	G G	T T	T T	C C	G G	C C	A A	A A	A A	G G
Case	C T	C T	T T	C G	A G	A T	A G	C T	A G	C T	G T	C T	G G	C T	A G	A T	A G	C G
Case	T T	T T	T T	G G	G G	T T	G G	T T	G G	T T	T T	C C	G G	C C	A A	A A	A A	G G
Case	C T	T T	C T	C G	A G	A T	A G	C T	A G	C T	G T	C T	G G	C T	A G	A T	A G	C G
Case	T T	T T	T T	G G	G G	T T	G G	T T	G G	T T	T T	C C	G G	C C	A A	A A	A A	G G
Case	T T	T T	T T	G G	G G	T T	G G	T T	G G	T T	T T	C C	G G	C C	A A	A A	A A	G G
Case	C T	C T	T T	C G	A G	A T	A G	C T	A G	C T	G T	C T	G G	C T	A G	A T	A G	C G
Case	C T	C T	T T	C G	A G	A T	A G	C T	A G	C T	G T	C T	G G	C T	A G	A T	A G	C G
Case	T T	T T	T T	G G	G G	T T	G G	T T	G G	T T	T T	C C	G G	C C	A A	A A	A A	G G
Case	T T	T T	T T	G G	G G	T T	G G	C T	G G	T T	G T	C C	A G	C C	A A	A A	A A	G G
Case	T T	T T	T T	G G	G G	T T	G G	C T	G G	T T	G T	C C	A G	C C	A A	A A	A A	G G
Case	T T	T T	T T	G G	G G	T T	G G	T T	G G	T T	T T	C C	G G	C C	A A	A A	A A	G G
Case	T T	T T	T T	G G	G G	T T	G G	T T	G G	T T	T T	C C	G G	C C	A A	A A	A A	G G
Case	T T	T T	T T	G G	G G	T T	G G	C T	G G	T T	G T	C C	A G	C C	A A	A A	A A	G G
Case	T T	T T	T T	G G	G G	T T	G G	C T	G G	T T	G T	C C	A G	C C	A A	A A	A A	G G
Case	T T	T T	T T	G G	G G	T T	G G	T T	G G	T T	T T	C C	G G	C C	A A	A A	A A	G G
Case	T T	T T	T T	G G	G G	T T	G G	C T	G G	T T	G T	C C	A G	C C	A A	A A	A A	G G
Case	C T	C T	T T	C G	A G	A T	A G	C C	A G	C T	G G	C T	A G	C T	A G	A T	A G	C G
Case	T T	T T	T T	G G	G G	T T	G G	C T	G G	T T	G T	C C	A G	C C	A A	A A	A A	G G
Case	T T	T T	T T	G G	G G	T T	G G	C T	G G	T T	G T	C C	A G	C C	A A	A A	A A	G G
Case	T T	T T	T T	G G	G G	T T	G G	T T	G G	T T	T T	C C	G G	C C	A A	A A	A A	G G
Case	T T	T T	T T	G G	G G	T T	G G	C T	G G	T T	G T	C C	A G	C C	A A	A A	A A	G G
Case	T T	T T	T T	G G	G G	T T	G G	C T	G G	T T	G T	C C	A G	C C	A A	A A	A A	G G
Case	C T	C T	T T	C G	A G	A T	A G	C C	A G	C T	G G	C T	A G	C T	A G	A T	A G	C G
Case	T T	T T	T T	G G	G G	T T	G G	C T	G G	T T	G T	C C	A G	C C	A A	A A	A A	G G
Case	C T	C T	T T	C G	A G	A T	A G	C T	A G	C T	G T	C T	G G	C T	A G	A T	A G	C G
Case	T T	T T	T T	G G	G G	T T	G G	T T	G G	T T	T T	C C	G G	C C	A A	A A	A A	G G
Case	T T	T T	T T	G G	G G	T T	G G	T T	G G	T T	T T	C C	G G	C C	A A	A A	A A	G G
Case	T T	T T	T T	G G	G G	T T	G G	T T	G G	T T	T T	C C	G G	C C	A A	A A	A A	G G
Case	T T	T T	T T	G G	G G	T T	G G	C T	G G	T T	G T	C C	A G	C C	A A	A A	A A	G G
Case	T T	T T	T T	G G	G G	T T	G G	T T	G G	T T	T T	C C	G G	C C	A A	A A	A A	G G
Case	T T	T T	T T	G G	G G	T T	G G	C C	G G	T T	G G	C C	A A	C C	A A	A A	A A	G G
Case	C T	C T	T T	C G	A G	A T	A G	C T	A G	C T	G T	C T	G G	C T	A G	A T	A G	C G
Case	T T	T T	T T	G G	G G	T T	G G	T T	G G	T T	T T	C C	G G	C C	A A	A A	A A	G G
Case	C T	T T	C T	C G	A G	A T	A G	C C	A G	C T	G G	C T	A G	C T	A G	A T	A G	C G
Case	T T	T T	T T	G G	G G	T T	G G	C T	G G	T T	G T	C C	A G	C C	A A	A A	A A	G G
Case	T T	T T	T T	G G	G G	T T	G G	C C	G G	T T	G G	C C	A A	C C	A A	A A	A A	G G
Case	T T	T T	T T	G G	G G	T T	G G	T T	G G	T T	T T	C C	G G	C C	A A	A A	A A	G G
Case	T T	T T	T T	G G	G G	T T	G G	C T	G G	T T	G T	C C	A G	C C	A A	A A	A A	G G
Case	T T	T T	T T	G G	G G	T T	G G	T T	G G	T T	T T	C C	G G	C C	A A	A A	A A	G G
Case	T T	T T	T T	G G	G G	T T	G G	T T	G G	T T	T T	C C	G G	C C	A A	A A	A A	G G
Case	T T	T T	T T	G G	G G	T T	G G	T T	G G	T T	T T	C C	G G	C C	A A	A A	A A	G G
Case	T T	T T	T T	G G	G G	T T	G G	T T	G G	T T	T T	C C	G G	C C	A A	A A	A A	G G
Case	C T	C T	T T	C G	A G	A T	A G	C T	A G	C T	G T	C T	G G	C T	A G	A T	A G	C G
Case	T T	T T	T T	G G	G G	T T	G G	C T	G G	T T	G T	C C	A G	C C	A A	A A	A A	G G
Case	T T	T T	T T	G G	G G	T T	G G	T T	G G	T T	T T	C C	G G	C C	A A	A A	A A	G G
Case	T T	T T	T T	G G	G G	T T	G G	C T	G G	T T	G T	C C	A G	C C	A A	A A	A A	G G
Case	T T	T T	T T	G G	G G	T T	G G	C T	G G	T T	G T	C C	A G	C C	A A	A A	A A	G G
Case	C T	C T	T T	C G	A G	A T	A G	C T	A G	C T	G T	C T	G G	C T	A G	A T	A G	C G
Case	C T	C T	T T	C G	A G	A T	A G	C C	A G	C T	G G	C T	A G	C T	A G	A T	A G	C G
Case	T T	T T	T T	G G	G G	T T	G G	T T	G G	T T	T T	C C	G G	C C	A A	A A	A A	G G
Case	C T	C T	T T	C G	A G	A T	A G	C T	A G	C T	G T	C T	G G	C T	A G	A T	A G	C G
Case	T T	T T	T T	G G	G G	T T	G G	C T	G G	T T	G T	C C	A G	C C	A A	A A	A A	G G
Case	T T	T T	T T	G G	G G	T T	G G	T T	G G	T T	T T	C C	G G	C C	A A	A A	A A	G G
Case	T T	T T	T T	G G	G G	T T	G G	C T	G G	T T	G T	C C	A G	C C	A A	A A	A A	G G
Case	T T	T T	T T	G G	G G	T T	G G	C T	G G	T T	G T	C C	A G	C C	A A	A A	A A	G G
Case	C T	C T	T T	C G	A G	A T	A G	C T	A G	C T	G T	C T	G G	C T	A G	A T	A G	C G
Case	T T	T T	T T	G G	G G	T T	G G	T T	G G	T T	T T	C C	G G	C C	A A	A A	A A	G G
Case	T T	T T	T T	G G	G G	T T	G G	C T	G G	T T	G T	C C	A G	C C	A A	A A	A A	G G
Case	T T	T T	T T	G G	G G	T T	G G	T T	G G	T T	T T	C C	G G	C C	A A	A A	A A	G G
Case	T T	T T	T T	G G	G G	T T	G G	T T	G G	T T	T T	C C	G G	C C	A A	A A	A A	G G
Case	T T	T T	T T	G G	G G	T T	G G	T T	G G	T T	T T	C C	G G	C C	A A	A A	A A	G G
Case	C T	T T	C T	C G	A G	A T	A G	C T	A G	C T	G T	C T	G G	C T	A G	A T	A G	C G
Case	T T	T T	T T	G G	G G	T T	G G	T T	G G	T T	T T	C C	G G	C C	A A	A A	A A	G G
Case	C T	C T	T T	C G	A G	A T	A G	C T	A G	C T	G T	C T	G G	C T	A G	A T	A G	C G
Case	T T	T T	T T	G G	G G	T T	G G	T T	G G	T T	T T	C C	G G	C C	A A	A A	A A	G G
Case	T T	T T	T T	G G	G G	T T	G G	T T	G G	T T	T T	C C	G G	C C	A A	A A	A A	G G
Case	T T	T T	T T	G G	G G	T T	G G	C T	G G	T T	G T	C C	A G	C C	A A	A A	A A	G G
Case	T T	T T	T T	G G	G G	T T	G G	T T	G G	T T	T T	C C	G G	C C	A A	A A	A A	G G
Case	T T	T T	T T	G G	G G	T T	G G	C T	G G	T T	G T	C C	A G	C C	A A	A A	A A	G G
Case	T T	T T	T T	G G	G G	T T	G G	C T	G G	T T	G T	C C	A G	C C	A A	A A	A A	G G
Case	T T	T T	T T	G G	G G	T T	G G	T T	G G	T T	T T	C C	G G	C C	A A	A A	A A	G G
Case	C T	C T	T T	C G	A G	A T	A G	C C	A G	C T	G G	C T	A G	C T	A G	A T	A G	C G
Case	C T	T T	C T	C G	A G	A T	A G	C T	A G	C T	G T	C T	G G	C T	A G	A T	A G	C G
Case	T T	T T	T T	G G	G G	T T	G G	T T	G G	T T	T T	C C	G G	C C	A A	A A	A A	G G
Case	C T	C T	T T	C G	A G	A T	A G	C T	A G	C T	G T	C T	G G	C T	A G	A T	A G	C G
Case	T T	T T	T T	G G	G G	T T	G G	T T	G G	T T	T T	C C	G G	C C	A A	A A	A A	G G
Case	T T	T T	T T	G G	G G	T T	G G	T T	G G	T T	T T	C C	G G	C C	A A	A A	A A	G G
Case	C T	C T	T T	C G	A G	A T	A G	C C	A G	C T	G G	C T	A G	C T	A G	A T	A G	C G
Case	C T	T T	C T	C G	A G	A T	A G	C T	A G	C T	G T	C T	G G	C T	A G	A T	A G	C G
Case	T T	T T	T T	G G	G G	T T	G G	C T	G G	T T	G T	C C	A G	C C	A A	A A	A A	G G
Case	T T	T T	T T	G G	G G	T T	G G	T T	G G	T T	T T	C C	G G	C C	A A	A A	A A	G G
Case	C T	T T	C T	C G	A G	A T	A G	C T	A G	C T	G T	C T	G G	C T	A G	A T	A G	C G
Case	T T	T T	T T	G G	G G	T T	G G	C T	G G	T T	G T	C C	A G	C C	A A	A A	A A	G G
Case	T T	T T	T T	G G	G G	T T	G G	T T	G G	T T	T T	C C	G G	C C	A A	A A	A A	G G
Case	T T	T T	T T	G G	G G	T T	G G	C T	G G	T T	G T	C C	A G	C C	A A	A A	A A	G G
Case	T T	T T	T T	G G	G G	T T	G G	T T	G G	T T	T T	C C	G G	C C	A A	A A	A A	G G
Case	T T	T T	T T	G G	G G	T T	G G	T T	G G	T T	T T	C C	G G	C C	A A	A A	A A	G G
Case	C C	T T	C C	C C	A A	A A	A A	C C	A A	C C	G G	T T	G G	T T	G G	T T	G G	C C
Case	T T	T T	T T	G G	G G	T T	G G	T T	G G	T T	T T	C C	G G	C C	A A	A A	A A	G G
Case	C T	T T	C T	C G	A G	A T	A G	C T	A G	C T	G T	C T	G G	C T	A G	A T	A G	C G
Case	C T	T T	C T	C G	A G	A T	A G	C T	A G	C T	G T	C T	G G	C T	A G	A T	A G	C G
Case	C T	C T	T T	C G	A G	A T	A G	C C	A G	C T	G G	C T	A G	C T	A G	A T	A G	C G
Case	T T	T T	T T	G G	G G	T T	G G	T T	G G	T T	T T	C C	G G	C C	A A	A A	A A	G G
Case	T T	T T	T T	G G	G G	T T	G G	T T	G G	T T	T T	C C	G G	C C	A A	A A	A A	G G
Case	T T	T T	T T	G G	G G	T T	G G	T T	G G	T T	T T	C C	G G	C C	A A	A A	A A	G G
Case	T T	T T	T T	G G	G G	T T	G G	T T	G G	T T	T T	C C	G G	C C	A A	A A	A A	G G
Case	C T	C T	T T	C G	A G	A T	A G	C T	A G	C T	G T	C T	G G	C T	A G	A T	A G	C G
Case	T T	T T	T T	G G	G G	T T	G G	T T	G G	T T	T T	C C	G G	C C	A A	A A	A A	G G
Case	C T	T T	C T	C G	A G	A T	A G	C C	A G	C T	G G	C T	A G	C T	A G	A T	A G	C G
Case	C T	C T	T T	C G	A G	A T	A G	C T	A G	C T	G T	C T	G G	C T	A G	A T	A G	C G
Case	T T	T T	T T	G G	G G	T T	G G	T T	G G	T T	T T	C C	G G	C C	A A	A A	A A	G G
Case	C T	C T	T T	C G	A G	A T	A G	C T	A G	C T	G T	C T	G G	C T	A G	A T	A G	C G
Case	T T	T T	T T	G G	G G	T T	G G	C T	G G	T T	G T	C C	A G	C C	A A	A A	A A	G G
Case	T T	T T	T T	G G	G G	T T	G G	T T	G G	T T	T T	C C	G G	C C	A A	A A	A A	G G
Case	T T	T T	T T	G G	G G	T T	G G	C T	G G	T T	G T	C C	A G	C C	A A	A A	A A	G G
Case	T T	T T	T T	G G	G G	T T	G G	T T	G G	T T	T T	C C	G G	C C	A A	A A	A A	G G
Case	T T	T T	T T	G G	G G	T T	G G	T T	G G	T T	T T	C C	G G	C C	A A	A A	A A	G G
Case	C T	T T	C T	C G	A G	A T	A G	C T	A G	C T	G T	C T	G G	C T	A G	A T	A G	C G
Case	C T	C T	T T	C G	A G	A T	A G	C T	A G	C T	G T	C T	G G	C T	A G	A T	A G	C G
Case	T T	T T	T T	G G	G G	T T	G G	T T	G G	T T	T T	C C	G G	C C	A A	A A	A A	G G
Case	T T	T T	T T	G G	G G	T T	G G	C T	G G	T T	G T	C C	A G	C C	A A	A A	A A	G G
Case	T T	T T	T T	G G	G G	T T	G G	T T	G G	T T	T T	C C	G G	C C	A A	A A	A A	G G
Case	T T	T T	T T	G G	G G	T T	G G	C T	G G	T T	G T	C C	A G	C C	A A	A A	A A	G G
Case	C T	C T	T T	C G	A G	A T	A G	C C	A G	C T	G G	C T	A G	C T	A G	A T	A G	C G
Case	C T	T T	C T	C G	A G	A T	A G	C C	A G	C T	G G	C T	A G	C T	A G	A T	A G	C G
Case	T T	T T	T T	G G	G G	T T	G G	C T	G G	T T	G T	C C	A G	C C	A A	A A	A A	G G
Case	T T	T T	T T	G G	G G	T T	G G	C T	G G	T T	G T	C C	A G	C C	A A	A A	A A	G G
Case	C T	C T	T T	C G	A G	A T	A G	C C	A G	C T	G G	C T	A G	C T	A G	A T	A G	C G
Case	T T	T T	T T	G G	G G	T T	G G	C T	G G	T T	G T	C C	A G	C C	A A	A A	A A	G G
Case	T T	T T	T T	G G	G G	T T	G G	C T	G G	T T	G T	C C	A G	C C	A A	A A	A A	G G
Case	T T	T T	T T	G G	G G	T T	G G	T T	G G	T T	T T	C C	G G	C C	A A	A A	A A	G G
Case	T T	T T	T T	G G	G G	T T	G G	C T	G G	T T	G T	C C	A G	C C	A A	A A	A A	G G
Case	C T	C T	T T	C G	A G	A T	A G	C T	A G	C T	G T	C T	G G	C T	A G	A T	A G	C G
Case	C T	C T	T T	C G	A G	A T	A G	C T	A G	C T	G T	C T	G G	C T	A G	A T	A G	C G
Case	C T	T T	C T	C G	A G	A T	A G	C T	A G	C T	G T	C T	G G	C T	A G	A T	A G	C G
Case	T T	T T	T T	G G	G G	T T	G G	T T	G G	T T	T T	C C	G G	C C	A A	A A	A A	G G
Case	C T	C T	T T	C G	A G	A T	A G	C T	A G	C T	G T	C T	G G	C T	A G	A T	A G	C G
Case	T T	T T	T T	G G	G G	T T	G G	T T	G G	T T	T T	C C	G G	C C	A A	A A	A A	G G
Case	C T	C T	T T	C G	A G	A T	A G	C T	A G	C T	G T	C T	G G	C T	A G	A T	A G	C G
Case	T T	T T	T T	G G	G G	T T	G G	C T	G G	T T	G T	C C	A G	C C	A A	A A	A A	G G
Case	T T	T T	T T	G G	G G	T T	G G	C T	G G	T T	G T	C C	A G	C C	A A	A A	A A	G G
Case	T T	T T	T T	G G	G G	T T	G G	T T	G G	T T	T T	C C	G G	C C	A A	A A	A A	G G
Case	T T	T T	T T	G G	G G	T T	G G	T T	G G	T T	T T	C C	G G	C C	A A	A A	A A	G G
Case	T T	T T	T T	G G	G G	T T	G G	T T	G G	T T	T T	C C	G G	C C	A A	A A	A A	G G
Case	C T	C T	T T	C G	A G	A T	A G	C T	A G	C T	G T	C T	G G	C T	A G	A T	A G	C G
Case	T T	T T	T T	G G	G G	T T	G G	C T	G G	T T	G T	C C	A G	C C	A A	A A	A A	G G
Case	T T	T T	T T	G G	G G	T T	G G	C C	G G	T T	G G	C C	A A	C C	A A	A A	A A	G G
Case	C T	C T	T T	C G	A G	A T	A G	C T	A G	C T	G T	C T	G G	C T	A G	A T	A G	C G
Case	T T	T T	T T	G G	G G	T T	G G	T T	G G	T T	T T	C C	G G	C C	A A	A A	A A	G G
Case	T T	T T	T T	G G	G G	T T	G G	C T	G G	T T	G T	C C	A G	C C	A A	A A	A A	G G
Case	T T	T T	T T	G G	G G	T T	G G	C T	G G	T T	G T	C C	A G	C C	A A	A A	A A	G G
Case	C T	T T	C T	C G	A G	A T	A G	C T	A G	C T	G T	C T	G G	C T	A G	A T	A G	C G
Case	T T	T T	T T	G G	G G	T T	G G	T T	G G	T T	T T	C C	G G	C C	A A	A A	A A	G G
Case	T T	T T	T T	G G	G G	T T	G G	T T	G G	T T	T T	C C	G G	C C	A A	A A	A A	G G
Case	T T	T T	T T	G G	G G	T T	G G	T T	G G	T T	T T	C C	G G	C C	A A	A A	A A	G G
Case	C T	C T	T T	C G	A G	A T	A G	C T	A G	C T	G T	C T	G G	C T	A G	A T	A G	C G
Case	T T	T T	T T	G G	G G	T T	G G	T T	G G	T T	T T	C C	G G	C C	A A	A A	A A	G G
Case	T T	T T	T T	G G	G G	T T	G G	C T	G G	T T	G T	C C	A G	C C	A A	A A	A A	G G
Case	T T	T T	T T	G G	G G	T T	G G	T T	G G	T T	T T	C C	G G	C C	A A	A A	A A	G G
Case	T T	T T	T T	G G	G G	T T	G G	T T	G G	T T	T T	C C	G G	C C	A A	A A	A A	G G
Case	T T	T T	T T	G G	G G	T T	G G	T T	G G	T T	T T	C C	G G	C C	A A	A A	A A	G G
Case	T T	T T	T T	G G	G G	T T	G G	T T	G G	T T	T T	C C	G G	C C	A A	A A	A A	G G
Case	T T	T T	T T	G G	G G	T T	G G	T T	G G	T T	T T	C C	G G	C C	A A	A A	A A	G G
Case	T T	T T	T T	G G	G G	T T	G G	T T	G G	T T	T T	C C	G G	C C	A A	A A	A A	G G
Case	T T	T T	T T	G G	G G	T T	G G	T T	G G	T T	T T	C C	G G	C C	A A	A A	A A	G G
Case	C T	T T	C T	C G	A G	A T	A G	C T	A G	C T	G T	C T	G G	C T	A G	A T	A G	C G
Case	T T	T T	T T	G G	G G	T T	G G	T T	G G	T T	T T	C C	G G	C C	A A	A A	A A	G G
Case	T T	T T	T T	G G	G G	T T	G G	C T	G G	T T	G T	C C	A G	C C	A A	A A	A A	G G
Case	T T	T T	T T	G G	G G	T T	G G	T T	G G	T T	T T	C C	G G	C C	A A	A A	A A	G G
Case	T T	T T	T T	G G	G G	T T	G G	T T	G G	T T	T T	C C	G G	C C	A A	A A	A A	G G
Case	T T	T T	T T	G G	G G	T T	G G	T T	G G	T T	T T	C C	G G	C C	A A	A A	A A	G G
Case	T T	T T	T T	G G	G G	T T	G G	C T	G G	T T	G T	C C	A G	C C	A A	A A	A A	G G
Case	T T	T T	T T	G G	G G	T T	G G	C T	G G	T T	G T	C C	A G	C C	A A	A A	A A	G G
Case	T T	T T	T T	G G	G G	T T	G G	T T	G G	T T	T T	C C	G G	C C	A A	A A	A A	G G
Case	C T	C T	T T	C G	A G	A T	A G	C T	A G	C T	G T	C T	G G	C T	A G	A T	A G	C G
Case	T T	T T	T T	G G	G G	T T	G G	T T	G G	T T	T T	C C	G G	C C	A A	A A	A A	G G
Case	C T	T T	C T	C G	A G	A T	A G	C T	A G	C T	G T	C T	G G	C T	A G	A T	A G	C G
Case	T T	T T	T T	G G	G G	T T	G G	T T	G G	T T	T T	C C	G G	C C	A A	A A	A A	G G
Case	C T	C T	T T	C G	A G	A T	A G	C T	A G	C T	G T	C T	G G	C T	A G	A T	A G	C G
Case	T T	T T	T T	G G	G G	T T	G G	T T	G G	T T	T T	C C	G G	C C	A A	A A	A A	G G
Case	T T	T T	T T	G G	G G	T T	G G	C T	G G	T T	G T	C C	A G	C C	A A	A A	A A	G G
Case	T T	T T	T T	G G	G G	T T	G G	T T	G G	T T	T T	C C	G G	C C	A A	A A	A A	G G
Case	T T	T T	T T	G G	G G	T T	G G	T T	G G	T T	T T	C C	G G	C C	A A	A A	A A	G G
Case	T T	T T	T T	G G	G G	T T	G G	T T	G G	T T	T T	C C	G G	C C	A A	A A	A A	G G
Case	T T	T T	T T	G G	G G	T T	G G	T T	G G	T T	T T	C C	G G	C C	A A	A A	A A	G G
Case	T T	T T	T T	G G	G G	T T	G G	T T	G G	T T	T T	C C	G G	C C	A A	A A	A A	G G
Case	T T	T T	T T	G G	G G	T T	G G	C T	G G	T T	G T	C C	A G	C C	A A	A A	A A	G G
Case	0 0	T T	0 0	0 0	0 0	0 0	0 0	0 0	0 0	0 0	0 0	0 0	G G	0 0	0 0	0 0	0 0	0 0
Case	T T	T T	T T	G G	G G	T T	G G	C T	G G	T T	G T	C C	A G	C C	A A	A A	A A	G G
Case	C T	C T	T T	C G	A G	A T	A G	C C	A G	C T	G G	C T	A G	C T	A G	A T	A G	C G
Case	T T	T T	T T	G G	G G	T T	G G	T T	G G	T T	T T	C C	G G	C C	A A	A A	A A	G G
Case	C T	T T	C T	C G	A G	A T	A G	C T	A G	C T	G T	C T	G G	C T	A G	A T	A G	C G
Case	C T	C T	T T	C G	A G	A T	A G	C T	A G	C T	G T	C T	G G	C T	A G	A T	A G	C G
Case	T T	T T	T T	G G	G G	T T	G G	C T	G G	T T	G T	C C	A G	C C	A A	A A	A A	G G
Case	T T	T T	T T	G G	G G	T T	G G	T T	G G	T T	T T	C C	G G	C C	A A	A A	A A	G G
Case	T T	T T	T T	G G	G G	T T	G G	T T	G G	T T	T T	C C	G G	C C	A A	A A	A A	G G
Case	T T	T T	T T	G G	G G	T T	G G	C T	G G	T T	G T	C C	A G	C C	A A	A A	A A	G G
Case	T T	T T	T T	G G	G G	T T	G G	T T	G G	T T	T T	C C	G G	C C	A A	A A	A A	G G
Case	T T	T T	T T	G G	G G	T T	G G	T T	G G	T T	T T	C C	G G	C C	A A	A A	A A	G G
Case	T T	T T	T T	G G	G G	T T	G G	T T	G G	T T	T T	C C	G G	C C	A A	A A	A A	G G
Case	C T	T T	C T	C G	A G	A T	A G	C C	A G	C T	G G	C T	A G	C T	A G	A T	A G	C G
Case	T T	T T	T T	G G	G G	T T	G G	T T	G G	T T	T T	C C	G G	C C	A A	A A	A A	G G
Case	T T	T T	T T	G G	G G	T T	G G	C T	G G	T T	G T	C C	A G	C C	A A	A A	A A	G G
Case	T T	T T	T T	G G	G G	T T	G G	C T	G G	T T	G T	C C	A G	C C	A A	A A	A A	G G
Case	T T	T T	T T	G G	G G	T T	G G	C T	G G	T T	G T	C C	A G	C C	A A	A A	A A	G G
Case	T T	T T	T T	G G	G G	T T	G G	T T	G G	T T	T T	C C	G G	C C	A A	A A	A A	G G
Case	T T	T T	T T	G G	G G	T T	G G	C T	G G	T T	G T	C C	A G	C C	A A	A A	A A	G G
Case	T T	T T	T T	G G	G G	T T	G G	C T	G G	T T	G T	C C	A G	C C	A A	A A	A A	G G
Case	T T	T T	T T	G G	G G	T T	G G	C T	G G	T T	G T	C C	A G	C C	A A	A A	A A	G G
Case	T T	T T	T T	G G	G G	T T	G G	T T	G G	T T	T T	C C	G G	C C	A A	A A	A A	G G
Case	T T	T T	T T	G G	G G	T T	G G	C C	G G	T T	G G	C C	A A	C C	A A	A A	A A	G G
Case	T T	T T	T T	G G	G G	T T	G G	T T	G G	T T	T T	C C	G G	C C	A A	A A	A A	G G
Case	T T	T T	T T	G G	G G	T T	G G	T T	G G	T T	T T	C C	G G	C C	A A	A A	A A	G G
Case	T T	T T	T T	G G	G G	T T	G G	T T	G G	T T	T T	C C	G G	C C	A A	A A	A A	G G
Case	T T	T T	T T	G G	G G	T T	G G	T T	G G	T T	T T	C C	G G	C C	A A	A A	A A	G G
Case	T T	T T	T T	G G	G G	T T	G G	T T	G G	T T	T T	C C	G G	C C	A A	A A	A A	G G
Case	T T	T T	T T	G G	G G	T T	G G	T T	G G	T T	T T	C C	G G	C C	A A	A A	A A	G G
Case	T T	T T	T T	G G	G G	T T	G G	T T	G G	T T	T T	C C	G G	C C	A A	A A	A A	G G
Case	T T	T T	T T	G G	G G	T T	G G	C T	G G	T T	G T	C C	A G	C C	A A	A A	A A	G G
Case	T T	T T	T T	G G	G G	T T	G G	T T	G G	T T	T T	C C	G G	C C	A A	A A	A A	G G
Case	T T	T T	T T	G G	G G	T T	G G	T T	G G	T T	T T	C C	G G	C C	A A	A A	A A	G G
Case	T T	T T	T T	G G	G G	T T	G G	T T	G G	T T	T T	C C	G G	C C	A A	A A	A A	G G
Case	T T	T T	T T	G G	G G	T T	G G	C T	G G	T T	G T	C C	A G	C C	A A	A A	A A	G G
Case	T T	T T	T T	G G	G G	T T	G G	T T	G G	T T	T T	C C	G G	C C	A A	A A	A A	G G
Case	T T	T T	T T	G G	G G	T T	G G	C T	G G	T T	G T	C C	A G	C C	A A	A A	A A	G G
Case	C T	T T	C T	C G	A G	A T	A G	C C	A G	C T	G G	C T	A G	C T	A G	A T	A G	C G
Case	C T	C T	T T	C G	A G	A T	A G	C C	A G	C T	G G	C T	A G	C T	A G	A T	A G	C G
Case	T T	T T	T T	G G	G G	T T	G G	C C	G G	T T	G G	C C	A A	C C	A A	A A	A A	G G
Case	T T	T T	T T	G G	G G	T T	G G	C T	G G	T T	G T	C C	A G	C C	A A	A A	A A	G G
Case	T T	T T	T T	G G	G G	T T	G G	C T	G G	T T	G T	C C	A G	C C	A A	A A	A A	G G
Case	T T	T T	T T	G G	G G	T T	G G	C T	G G	T T	G T	C C	A G	C C	A A	A A	A A	G G
Case	T T	T T	T T	G G	G G	T T	G G	C T	G G	T T	G T	C C	A G	C C	A A	A A	A A	G G
Case	T T	T T	T T	G G	G G	T T	G G	C T	G G	T T	G T	C C	A G	C C	A A	A A	A A	G G
Case	C T	T T	C T	C G	A G	A T	A G	C C	A G	C T	G G	C T	A G	C T	A G	A T	A G	C G
Case	T T	T T	T T	G G	G G	T T	G G	C T	G G	T T	G T	C C	A G	C C	A A	A A	A A	G G
Case	T T	T T	T T	G G	G G	T T	G G	C T	G G	T T	G T	C C	A G	C C	A A	A A	A A	G G
Case	T T	T T	T T	G G	G G	T T	G G	C T	G G	T T	G T	C C	A G	C C	A A	A A	A A	G G
Case	T T	T T	T T	G G	G G	T T	G G	C T	G G	T T	G T	C C	A G	C C	A A	A A	A A	G G
Case	T T	T T	T T	G G	G G	T T	G G	C T	G G	T T	G T	C C	A G	C C	A A	A A	A A	G G
Case	T T	T T	T T	G G	G G	T T	G G	C T	G G	T T	G T	C C	A G	C C	A A	A A	A A	G G
Case	T T	T T	T T	G G	G G	T T	G G	C C	G G	T T	G G	C C	A A	C C	A A	A A	A A	G G
Case	T T	T T	T T	G G	G G	T T	G G	C T	G G	T T	G T	C C	A G	C C	A A	A A	A A	G G
Case	T T	T T	T T	G G	G G	T T	G G	C C	G G	T T	G G	C C	A A	C C	A A	A A	A A	G G
Case	T T	T T	T T	G G	G G	T T	G G	C T	G G	T T	G T	C C	A G	C C	A A	A A	A A	G G
Case	T T	T T	T T	G G	G G	T T	G G	C T	G G	T T	G T	C C	A G	C C	A A	A A	A A	G G
Case	C T	C T	T T	C G	A G	A T	A G	C C	A G	C T	G G	C T	A G	C T	A G	A T	A G	C G
Case	C T	C T	T T	C G	A G	A T	A G	C C	A G	C T	G G	C T	A G	C T	A G	A T	A G	C G
Case	T T	T T	T T	G G	G G	T T	G G	C C	G G	T T	G G	C C	A A	C C	A A	A A	A A	G G
Case	T T	T T	T T	G G	G G	T T	G G	C T	G G	T T	G T	C C	A G	C C	A A	A A	A A	G G
Case	T T	T T	T T	G G	G G	T T	G G	C T	G G	T T	G T	C C	A G	C C	A A	A A	A A	G G
Case	T T	T T	T T	G G	G G	T T	G G	C T	G G	T T	G T	C C	A G	C C	A A	A A	A A	G G
Case	T T	T T	T T	C C	G G	A A	G G	T T	G G	T T	T T	C C	G G	C C	A A	T T	A A	C C
Case	T T	T T	T T	C C	G G	A A	G G	T T	G G	T T	T T	C C	G G	C C	A A	T T	A A	C C
Case	C T	C T	T T	C G	A G	A T	A G	C C	A G	C T	G G	C T	A G	C T	A G	A T	A G	C G
Case	T T	T T	T T	C C	G G	A A	G G	T T	G G	T T	T T	C C	G G	C C	A A	T T	A A	C C
Case	C T	C T	T T	C G	A G	A T	A G	C T	A G	T T	G G	C T	A A	C T	A G	A T	A G	C G
Case	T T	T T	T T	C C	G G	A A	G G	T T	G G	T T	T T	C C	G G	C C	A A	T T	A A	C C
Case	T T	T T	T T	C C	G G	A A	G G	T T	G G	T T	T T	C C	G G	C C	A A	T T	A A	C C
Case	T T	T T	T T	C C	G G	A A	G G	T T	G G	T T	T T	C C	G G	C C	A A	T T	A A	C C
Case	T T	T T	T T	C C	G G	A A	G G	C C	G G	T T	G G	C C	A A	C C	A A	T T	A A	C C
Case	C T	C T	T T	C G	A G	A T	A G	C T	A G	T T	G G	C T	A A	C T	A G	A T	A G	C G
Case	T T	T T	T T	C C	G G	A A	G G	C T	G G	T T	G T	C C	A A	C C	A A	T T	A A	C C
Case	C T	C T	T T	C G	A G	A T	A G	C C	A G	C T	G G	C T	A G	C T	A G	A T	A G	C G
Case	C T	C T	T T	C G	A G	A T	A G	C T	A G	T T	G G	C T	A A	C T	A G	A T	A G	C G
Case	T T	T T	T T	C C	G G	A A	G G	C C	G G	T T	G T	C C	A A	C C	A A	T T	A A	C C
Case	T T	T T	T T	C C	G G	A A	G G	T T	G G	T T	T T	C C	G G	C C	A A	T T	A A	C C
Case	C T	C T	T T	C G	G G	A T	A G	C C	A G	C T	G G	C T	A G	C T	A G	A T	A G	C G
Case	C T	C T	T T	C G	G G	A A	G G	C C	G G	T T	G G	C T	A G	C T	A G	A T	A G	C G
Case	T T	T T	T T	C C	G G	A A	G G	C T	G G	T T	G T	C C	A A	C C	A A	T T	A A	C C
Case	T T	T T	T T	C C	G G	A A	G G	T T	G G	T T	T T	C C	G G	C C	A A	T T	A A	C C
Case	T T	T T	T T	C C	G G	A A	G G	T T	G G	T T	T T	C C	G G	C C	A A	T T	A A	C C
Case	T T	T T	T T	C C	G G	A A	G G	T T	G G	T T	T T	C C	G G	C C	A A	T T	A A	C C
Case	C T	C T	T T	C G	G G	A A	G G	C C	G G	T T	G G	C C	A A	C T	A G	A T	A G	C G
Case	T T	T T	T T	C C	G G	A A	G G	C T	G G	T T	G T	C C	A A	C C	A A	T T	A A	C C
Case	T T	T T	T T	C C	G G	A A	G G	T T	G G	T T	T T	C C	A A	C C	A A	T T	A A	C C
Case	T T	T T	T T	C C	G G	A A	G G	C C	G G	T T	G G	C C	A A	C C	A A	T T	A A	C C
Case	T T	T T	T T	C C	G G	A A	G G	T T	G G	T T	T T	C C	G G	C C	A A	T T	A A	C C
Case	T T	T T	T T	C C	G G	A A	G G	T T	G G	T T	G G	C C	G G	C C	A A	T T	A A	C C
Case	T T	T T	T T	C C	G G	A A	G G	T T	G G	T T	T T	C C	A A	C C	A A	T T	A A	C C
Case	T T	T T	T T	C C	G G	A A	G G	T T	G G	T T	G G	C C	G G	C C	A A	T T	A A	C C
Case	C T	T T	C T	C G	A G	A T	A G	C C	A G	C T	G G	C C	A A	C T	A G	A T	A G	C G
Control	T T	T T	T T	G G	G G	T T	G G	C T	G G	T T	G T	C C	A G	C C	A A	A A	A A	G G
Control	C T	T T	C T	C G	A G	A T	A G	C T	A G	C T	G T	C T	G G	C T	A G	A T	A G	C G
Control	T T	T T	T T	G G	G G	T T	G G	C T	G G	T T	G T	C C	A G	C C	A A	A A	A A	G G
Control	T T	T T	T T	G G	G G	T T	G G	T T	G G	T T	T T	C C	G G	C C	A A	A A	A A	G G
Control	T T	T T	T T	G G	G G	T T	G G	C T	G G	T T	G T	C C	A G	C C	A A	A A	A A	G G
Control	T T	T T	T T	G G	G G	T T	G G	T T	G G	T T	T T	C C	G G	C C	A A	A A	A A	G G
Control	T T	T T	T T	G G	G G	T T	G G	T T	G G	T T	T T	C C	G G	C C	A A	A A	A A	G G
Control	C T	T T	C T	C G	A G	A T	A G	C T	A G	C T	G T	C T	G G	C T	A G	A T	A G	C G
Control	C T	C T	T T	C G	A G	A T	A G	C T	A G	C T	G T	C T	G G	C T	A G	A T	A G	C G
Control	T T	T T	T T	G G	G G	T T	G G	C T	G G	T T	G T	C C	A G	C C	A A	A A	A A	G G
Control	T T	T T	T T	G G	G G	T T	G G	C T	G G	T T	G T	C C	A G	C C	A A	A A	A A	G G
Control	T T	T T	T T	G G	G G	T T	G G	T T	G G	T T	T T	C C	G G	C C	A A	A A	A A	G G
Control	C T	C T	T T	C G	A G	A T	A G	C T	A G	C T	G T	C T	G G	C T	A G	A T	A G	C G
Control	T T	T T	T T	G G	G G	T T	G G	C T	G G	T T	G T	C C	A G	C C	A A	A A	A A	G G
Control	T T	T T	T T	G G	G G	T T	G G	T T	G G	T T	T T	C C	G G	C C	A A	A A	A A	G G
Control	T T	T T	T T	G G	G G	T T	G G	T T	G G	T T	T T	C C	G G	C C	A A	A A	A A	G G
Control	C T	C T	T T	C G	A G	A T	A G	C T	A G	C T	G T	C T	G G	C T	A G	A T	A G	C G
Control	C T	C T	T T	C G	A G	A T	A G	C T	A G	C T	G T	C T	G G	C T	A G	A T	A G	C G
Control	C T	C T	T T	C G	A G	A T	A G	C T	A G	C T	G T	C T	G G	C T	A G	A T	A G	C G
Control	T T	T T	T T	G G	G G	T T	G G	T T	G G	T T	T T	C C	G G	C C	A A	A A	A A	G G
Control	T T	T T	T T	G G	G G	T T	G G	C T	G G	T T	G T	C C	A G	C C	A A	A A	A A	G G
Control	T T	T T	T T	G G	G G	T T	G G	C T	G G	T T	G T	C C	A G	C C	A A	A A	A A	G G
Control	C T	C T	T T	C G	A G	A T	A G	C T	A G	C T	G T	C T	G G	C T	A G	A T	A G	C G
Control	T T	T T	T T	G G	G G	T T	G G	T T	G G	T T	T T	C C	G G	C C	A A	A A	A A	G G
Control	C T	C T	T T	C G	A G	A T	A G	C T	A G	C T	G T	C T	G G	C T	A G	A T	A G	C G
Control	C T	C T	T T	C G	A G	A T	A G	C T	A G	C T	G T	C T	G G	C T	A G	A T	A G	C G
Control	T T	T T	T T	G G	G G	T T	G G	T T	G G	T T	T T	C C	G G	C C	A A	A A	A A	G G
Control	T T	T T	T T	G G	G G	T T	G G	T T	G G	T T	T T	C C	G G	C C	A A	A A	A A	G G
Control	T T	T T	T T	G G	G G	T T	G G	C T	G G	T T	G T	C C	A G	C C	A A	A A	A A	G G
Control	C T	C T	T T	C G	A G	A T	A G	C T	A G	C T	G T	C T	G G	C T	A G	A T	A G	C G
Control	C T	T T	C T	C G	A G	A T	A G	C T	A G	C T	G T	C T	G G	C T	A G	A T	A G	C G
Control	C T	T T	C T	C G	A G	A T	A G	C T	A G	C T	G T	C T	G G	C T	A G	A T	A G	C G
Control	T T	T T	T T	G G	G G	T T	G G	T T	G G	T T	T T	C C	G G	C C	A A	A A	A A	G G
Control	T T	T T	T T	G G	G G	T T	G G	C T	G G	T T	G T	C C	A G	C C	A A	A A	A A	G G
Control	C T	T T	C T	C G	A G	A T	A G	C T	A G	C T	G T	C T	G G	C T	A G	A T	A G	C G
Control	T T	T T	T T	G G	G G	T T	G G	T T	G G	T T	T T	C C	G G	C C	A A	A A	A A	G G
Control	C T	C T	T T	C G	A G	A T	A G	C T	A G	C T	G T	C T	G G	C T	A G	A T	A G	C G
Control	T T	T T	T T	G G	G G	T T	G G	T T	G G	T T	T T	C C	G G	C C	A A	A A	A A	G G
Control	T T	T T	T T	G G	G G	T T	G G	C T	G G	T T	G T	C C	A G	C C	A A	A A	A A	G G
Control	T T	T T	T T	G G	G G	T T	G G	T T	G G	T T	T T	C C	G G	C C	A A	A A	A A	G G
Control	C T	T T	C T	C G	A G	A T	A G	C T	A G	C T	G T	C T	G G	C T	A G	A T	A G	C G
Control	T T	T T	T T	G G	G G	T T	G G	T T	G G	T T	T T	C C	G G	C C	A A	A A	A A	G G
Control	T T	T T	T T	G G	G G	T T	G G	T T	G G	T T	T T	C C	G G	C C	A A	A A	A A	G G
Control	T T	T T	T T	G G	G G	T T	G G	T T	G G	T T	T T	C C	G G	C C	A A	A A	A A	G G
Control	T T	T T	T T	G G	G G	T T	G G	T T	G G	T T	T T	C C	G G	C C	A A	A A	A A	G G
Control	0 0	0 0	T T	0 0	0 0	0 0	0 0	0 0	0 0	0 0	0 0	C T	A G	C T	A G	A T	A G	C G
Control	T T	T T	T T	G G	G G	T T	G G	C T	G G	T T	G T	C C	A G	C C	A A	A A	A A	G G
Control	C T	C T	T T	C G	A G	A T	A G	C T	A G	C T	G T	C T	G G	C T	A G	A T	A G	C G
Control	C T	C T	T T	C G	A G	A T	A G	C C	A G	C T	G G	C T	A G	C T	A G	A T	A G	C G
Control	C T	T T	C T	C G	A G	A T	A G	C T	A G	C T	G T	C T	G G	C T	A G	A T	A G	C G
Control	T T	T T	T T	G G	G G	T T	G G	C T	G G	T T	G T	C C	A G	C C	A A	A A	A A	G G
Control	T T	T T	T T	G G	G G	T T	G G	T T	G G	T T	T T	C C	G G	C C	A A	A A	A A	G G
Control	C T	C T	T T	C G	A G	A T	A G	C T	A G	C T	G T	C T	G G	C T	A G	A T	A G	C G
Control	T T	T T	T T	G G	G G	T T	G G	T T	G G	T T	T T	C C	G G	C C	A A	A A	A A	G G
Control	T T	T T	T T	G G	G G	T T	G G	T T	G G	T T	T T	C C	G G	C C	A A	A A	A A	G G
Control	C T	C T	T T	C G	A G	A T	A G	C T	A G	C T	G T	C T	G G	C T	A G	A T	A G	C G
Control	T T	T T	T T	G G	G G	T T	G G	T T	G G	T T	T T	C C	G G	C C	A A	A A	A A	G G
Control	T T	T T	T T	G G	G G	T T	G G	T T	G G	T T	T T	C C	G G	C C	A A	A A	A A	G G
Control	T T	T T	T T	G G	G G	T T	G G	C T	G G	T T	G T	C C	A G	C C	A A	A A	A A	G G
Control	T T	T T	T T	G G	G G	T T	G G	C T	G G	T T	G T	C C	A G	C C	A A	A A	A A	G G
Control	C T	C T	T T	C G	A G	A T	A G	C T	A G	C T	G T	C T	G G	C T	A G	A T	A G	C G
Control	C T	T T	C T	C G	A G	A T	A G	C T	A G	C T	G T	C T	G G	C T	A G	A T	A G	C G
Control	C C	C C	T T	C C	A A	A A	A A	C C	A A	C C	G G	T T	G G	T T	G G	T T	G G	C C
Control	T T	T T	T T	G G	G G	T T	G G	T T	G G	T T	T T	C C	G G	C C	A A	A A	A A	G G
Control	T T	T T	T T	G G	G G	T T	G G	C T	G G	T T	G T	C C	A G	C C	A A	A A	A A	G G
Control	T T	T T	T T	G G	G G	T T	G G	C T	G G	T T	G T	C C	A G	C C	A A	A A	A A	G G
Control	T T	T T	T T	G G	G G	T T	G G	C T	G G	T T	G T	C C	A G	C C	A A	A A	A A	G G
Control	T T	T T	T T	G G	G G	T T	G G	T T	G G	T T	T T	C C	G G	C C	A A	A A	A A	G G
Control	C T	C T	T T	C G	A G	A T	A G	C T	A G	C T	G T	C T	G G	C T	A G	A T	A G	C G
Control	C T	T T	C T	C G	A G	A T	A G	C T	A G	C T	G T	C T	G G	C T	A G	A T	A G	C G
Control	T T	T T	T T	G G	G G	T T	G G	C T	G G	T T	G T	C C	A G	C C	A A	A A	A A	G G
Control	T T	T T	T T	G G	G G	T T	G G	T T	G G	T T	T T	C C	G G	C C	A A	A A	A A	G G
Control	T T	T T	T T	G G	G G	T T	G G	C T	G G	T T	G T	C C	A G	C C	A A	A A	A A	G G
Control	T T	T T	T T	G G	G G	T T	G G	T T	G G	T T	T T	C C	G G	C C	A A	A A	A A	G G
Control	T T	T T	T T	G G	G G	T T	G G	T T	G G	T T	T T	C C	G G	C C	A A	A A	A A	G G
Control	T T	T T	T T	G G	G G	T T	G G	C T	G G	T T	G T	C C	A G	C C	A A	A A	A A	G G
Control	T T	T T	T T	G G	G G	T T	G G	T T	G G	T T	T T	C C	G G	C C	A A	A A	A A	G G
Control	C T	T T	C T	C G	A G	A T	A G	C T	A G	C T	G T	C T	G G	C T	A G	A T	A G	C G
Control	T T	T T	T T	G G	G G	T T	G G	T T	G G	T T	T T	C C	G G	C C	A A	A A	A A	G G
Control	T T	T T	T T	G G	G G	T T	G G	T T	G G	T T	T T	C C	G G	C C	A A	A A	A A	G G
Control	C T	C T	T T	C G	A G	A T	A G	C C	A G	C T	G G	C T	A G	C T	A G	A T	A G	C G
Control	T T	T T	T T	G G	G G	T T	G G	T T	G G	T T	T T	C C	G G	C C	A A	A A	A A	G G
Control	C T	C T	T T	C G	A G	A T	A G	C T	A G	C T	G T	C T	G G	C T	A G	A T	A G	C G
Control	T T	T T	T T	G G	G G	T T	G G	T T	G G	T T	T T	C C	G G	C C	A A	A A	A A	G G
Control	T T	T T	T T	G G	G G	T T	G G	C T	G G	T T	G T	C C	A G	C C	A A	A A	A A	G G
Control	T T	T T	T T	G G	G G	T T	G G	T T	G G	T T	T T	C C	G G	C C	A A	A A	A A	G G
Control	C T	T T	C T	C G	A G	A T	A G	C C	A G	C T	G G	C T	A G	C T	A G	A T	A G	C G
Control	T T	T T	T T	G G	G G	T T	G G	C T	G G	T T	G T	C C	A G	C C	A A	A A	A A	G G
Control	T T	T T	T T	G G	G G	T T	G G	C T	G G	T T	G T	C C	A G	C C	A A	A A	A A	G G
Control	T T	T T	T T	G G	G G	T T	G G	C T	G G	T T	G T	C C	A G	C C	A A	A A	A A	G G
Control	T T	T T	T T	G G	G G	T T	G G	T T	G G	T T	T T	C C	G G	C C	A A	A A	A A	G G
Control	T T	T T	T T	G G	G G	T T	G G	T T	G G	T T	T T	C C	G G	C C	A A	A A	A A	G G
Control	T T	T T	T T	G G	G G	T T	G G	T T	G G	T T	T T	C C	G G	C C	A A	A A	A A	G G
Control	T T	T T	T T	G G	G G	T T	G G	C T	G G	T T	G T	C C	A G	C C	A A	A A	A A	G G
Control	T T	T T	T T	G G	G G	T T	G G	T T	G G	T T	T T	C C	G G	C C	A A	A A	A A	G G
Control	T T	T T	T T	G G	G G	T T	G G	C T	G G	T T	G T	C C	A G	C C	A A	A A	A A	G G
Control	C T	C T	T T	C G	A G	A T	A G	C T	A G	C T	G T	C T	G G	C T	A G	A T	A G	C G
Control	T T	T T	T T	G G	G G	T T	G G	T T	G G	T T	T T	C C	G G	C C	A A	A A	A A	G G
Control	T T	T T	T T	G G	G G	T T	G G	T T	G G	T T	T T	C C	G G	C C	A A	A A	A A	G G
Control	T T	T T	T T	G G	G G	T T	G G	T T	G G	T T	T T	C C	G G	C C	A A	A A	A A	G G
Control	T T	T T	T T	G G	G G	T T	G G	C T	G G	T T	G T	C C	A G	C C	A A	A A	A A	G G
Control	T T	T T	T T	G G	G G	T T	G G	T T	G G	T T	T T	C C	G G	C C	A A	A A	A A	G G
Control	T T	T T	T T	G G	G G	T T	G G	C T	G G	T T	G T	C C	A G	C C	A A	A A	A A	G G
Control	C T	T T	C T	C G	A G	A T	A G	C T	A G	C T	G T	C T	G G	C T	A G	A T	A G	C G
Control	T T	T T	T T	G G	G G	T T	G G	T T	G G	T T	T T	C C	G G	C C	A A	A A	A A	G G
Control	T T	T T	T T	G G	G G	T T	G G	T T	G G	T T	T T	C C	G G	C C	A A	A A	A A	G G
Control	C T	C T	T T	C G	A G	A T	A G	C T	A G	C T	G T	C T	G G	C T	A G	A T	A G	C G
Control	T T	T T	T T	G G	G G	T T	G G	C T	G G	T T	G T	C C	A G	C C	A A	A A	A A	G G
Control	C T	T T	C T	C G	A G	A T	A G	C T	A G	C T	G T	C T	G G	C T	A G	A T	A G	C G
Control	C T	C T	T T	C G	A G	A T	A G	C T	A G	C T	G T	C T	G G	C T	A G	A T	A G	C G
Control	T T	T T	T T	G G	G G	T T	G G	C T	G G	T T	G T	C C	A G	C C	A A	A A	A A	G G
Control	T T	T T	T T	G G	G G	T T	G G	C T	G G	T T	G T	C C	A G	C C	A A	A A	A A	G G
Control	C T	C T	T T	C G	A G	A T	A G	C T	A G	C T	G T	C T	G G	C T	A G	A T	A G	C G
Control	C T	C T	T T	C G	A G	A T	A G	C T	A G	C T	G T	C T	G G	C T	A G	A T	A G	C G
Control	C T	C T	T T	C G	A G	A T	A G	C T	A G	C T	G T	C T	G G	C T	A G	A T	A G	C G
Control	T T	T T	T T	G G	G G	T T	G G	T T	G G	T T	T T	C C	G G	C C	A A	A A	A A	G G
Control	T T	T T	T T	G G	G G	T T	G G	T T	G G	T T	T T	C C	G G	C C	A A	A A	A A	G G
Control	T T	T T	T T	G G	G G	T T	G G	C T	G G	T T	G T	C C	A G	C C	A A	A A	A A	G G
Control	T T	T T	T T	G G	G G	T T	G G	T T	G G	T T	T T	C C	G G	C C	A A	A A	A A	G G
Control	T T	T T	T T	G G	G G	T T	G G	T T	G G	T T	T T	C C	G G	C C	A A	A A	A A	G G
Control	T T	T T	T T	G G	G G	T T	G G	T T	G G	T T	T T	C C	G G	C C	A A	A A	A A	G G
Control	C T	T T	T T	C G	A G	A T	A G	C T	A G	C T	G T	C T	G G	C T	A G	A T	A G	C G
Control	T T	T T	T T	G G	G G	T T	G G	C T	G G	T T	G T	C C	A G	C C	A A	A A	A A	G G
Control	C T	T T	C T	C G	A G	A T	A G	C C	A G	C T	G G	C T	A G	C T	A G	A T	A G	C G
Control	T T	T T	T T	G G	G G	T T	G G	T T	G G	T T	T T	C C	G G	C C	A A	A A	A A	G G
Control	T T	T T	T T	G G	G G	T T	G G	C T	G G	T T	G T	C C	A G	C C	A A	A A	A A	G G
Control	T T	T T	T T	G G	G G	T T	G G	T T	G G	T T	T T	C C	G G	C C	A A	A A	A A	G G
Control	T T	T T	T T	G G	G G	T T	G G	T T	G G	T T	T T	C C	G G	C C	A A	A A	A A	G G
Control	T T	T T	T T	G G	G G	T T	G G	C T	G G	T T	G T	C C	A G	C C	A A	A A	A A	G G
Control	T T	T T	T T	G G	G G	T T	G G	T T	G G	T T	T T	C C	G G	C C	A A	A A	A A	G G
Control	T T	T T	T T	G G	G G	T T	G G	C T	G G	T T	G T	C C	A G	C C	A A	A A	A A	G G
Control	T T	T T	T T	G G	G G	T T	G G	T T	G G	T T	T T	C C	G G	C C	A A	A A	A A	G G
Control	C T	C T	T T	C G	A G	A T	A G	C T	A G	C T	G T	C T	G G	C T	A G	A T	A G	C G
Control	T T	T T	T T	G G	G G	T T	G G	C T	G G	T T	G T	C C	A G	C C	A A	A A	A A	G G
Control	C T	T T	C T	C G	A G	A T	A G	C T	A G	C T	G T	C T	G G	C T	A G	A T	A G	C G
Control	T T	T T	T T	G G	G G	T T	G G	C T	G G	T T	G T	C C	A G	C C	A A	A A	A A	G G
Control	T T	T T	T T	G G	G G	T T	G G	T T	G G	T T	T T	C C	G G	C C	A A	A A	A A	G G
Control	C T	T T	C T	C G	A G	A T	A G	C T	A G	C T	G T	C T	G G	C T	A G	A T	A G	C G
Control	C T	C T	T T	C G	A G	A T	A G	C T	A G	C T	G T	C T	G G	C T	A G	A T	A G	C G
Control	T T	T T	T T	G G	G G	T T	G G	T T	G G	T T	T T	C C	G G	C C	A A	A A	A A	G G
Control	T T	T T	T T	G G	G G	T T	G G	C T	G G	T T	G T	C C	A G	C C	A A	A A	A A	G G
Control	T T	T T	T T	G G	G G	T T	G G	C T	G G	T T	G T	C C	A G	C C	A A	A A	A A	G G
Control	T T	T T	T T	G G	G G	T T	G G	C T	G G	T T	G T	C C	A G	C C	A A	A A	A A	G G
Control	T T	T T	T T	G G	G G	T T	G G	T T	G G	T T	T T	C C	G G	C C	A A	A A	A A	G G
Control	T T	T T	T T	G G	G G	T T	G G	T T	G G	T T	T T	C C	G G	C C	A A	A A	A A	G G
Control	C T	T T	C T	C G	A G	A T	A G	C T	A G	C T	G T	C T	G G	C T	A G	A T	A G	C G
Control	T T	T T	T T	G G	G G	T T	G G	C T	G G	T T	G T	C C	A G	C C	A A	A A	A A	G G
Control	C T	C T	T T	C G	A G	A T	A G	C T	A G	C T	G T	C T	G G	C T	A G	A T	A G	C G
Control	C T	C T	T T	C G	A G	A T	A G	C T	A G	C T	G T	C T	G G	C T	A G	A T	A G	C G
Control	T T	T T	T T	G G	G G	T T	G G	C T	G G	T T	G T	C C	A G	C C	A A	A A	A A	G G
Control	T T	T T	T T	G G	G G	T T	G G	T T	G G	T T	T T	C C	G G	C C	A A	A A	A A	G G
Control	T T	T T	T T	G G	G G	T T	G G	C T	G G	T T	G T	C C	A G	C C	A A	A A	A A	G G
Control	T T	T T	T T	G G	G G	T T	G G	T T	G G	T T	T T	C C	G G	C C	A A	A A	A A	G G
Control	T T	T T	T T	G G	G G	T T	G G	T T	G G	T T	T T	C C	G G	C C	A A	A A	A A	G G
Control	T T	T T	T T	G G	G G	T T	G G	T T	G G	T T	T T	C C	G G	C C	A A	A A	A A	G G
Control	C T	C T	T T	C G	A G	A T	A G	C T	A G	C T	G T	C T	G G	C T	A G	A T	A G	C G
Control	T T	T T	T T	G G	G G	T T	G G	T T	G G	T T	T T	C C	G G	C C	A A	A A	A A	G G
Control	T T	T T	T T	G G	G G	T T	G G	C T	G G	T T	G T	C C	A G	C C	A A	A A	A A	G G
Control	T T	T T	T T	G G	G G	T T	G G	C T	G G	T T	G T	C C	A G	C C	A A	A A	A A	G G
Control	C T	T T	C T	C G	A G	A T	A G	C C	A G	C T	G G	C T	A G	C T	A G	A T	A G	C G
Control	T T	T T	T T	G G	G G	T T	G G	T T	G G	T T	T T	C C	G G	C C	A A	A A	A A	G G
Control	T T	T T	T T	G G	G G	T T	G G	C T	G G	T T	G T	C C	A G	C C	A A	A A	A A	G G
Control	C T	T T	C T	C G	A G	A T	A G	C C	A G	C T	G G	C T	A G	C T	A G	A T	A G	C G
Control	T T	T T	T T	G G	G G	T T	G G	C T	G G	T T	G T	C C	A G	C C	A A	A A	A A	G G
Control	T T	T T	T T	G G	G G	T T	G G	C T	G G	T T	G T	C C	A G	C C	A A	A A	A A	G G
Control	T T	T T	T T	G G	G G	T T	G G	C T	G G	T T	G T	C C	A G	C C	A A	A A	A A	G G
Control	T T	T T	T T	G G	G G	T T	G G	C T	G G	T T	G T	C C	A G	C C	A A	A A	A A	G G
Control	T T	T T	T T	G G	G G	T T	G G	T T	G G	T T	T T	C C	G G	C C	A A	A A	A A	G G
Control	T T	T T	T T	G G	G G	T T	G G	T T	G G	T T	T T	C C	G G	C C	A A	A A	A A	G G
Control	C T	C T	T T	C G	A G	A T	A G	C T	A G	C T	G T	C T	G G	C T	A G	A T	A G	C G
Control	T T	T T	T T	G G	G G	T T	G G	C T	G G	T T	G T	C C	A G	C C	A A	A A	A A	G G
Control	T T	T T	T T	G G	G G	T T	G G	T T	G G	T T	T T	C C	G G	C C	A A	A A	A A	G G
Control	T T	T T	T T	G G	G G	T T	G G	T T	G G	T T	T T	C C	G G	C C	A A	A A	A A	G G
Control	T T	T T	T T	G G	G G	T T	G G	T T	G G	T T	T T	C C	G G	C C	A A	A A	A A	G G
Control	T T	T T	T T	G G	G G	T T	G G	C T	G G	T T	G T	C C	A G	C C	A A	A A	A A	G G
Control	T T	T T	T T	G G	G G	T T	G G	T T	G G	T T	T T	C C	G G	C C	A A	A A	A A	G G
Control	C T	T T	C T	C G	A G	A T	A G	C T	A G	C T	G T	C T	G G	C T	A G	A T	A G	C G
Control	T T	T T	T T	G G	G G	T T	G G	C T	G G	T T	G T	C C	A G	C C	A A	A A	A A	G G
Control	T T	T T	T T	G G	G G	T T	G G	T T	G G	T T	T T	C C	G G	C C	A A	A A	A A	G G
Control	T T	T T	T T	G G	G G	T T	G G	T T	G G	T T	T T	C C	G G	C C	A A	A A	A A	G G
Control	T T	T T	T T	G G	G G	T T	G G	T T	G G	T T	T T	C C	G G	C C	A A	A A	A A	G G
Control	T T	T T	T T	G G	G G	T T	G G	C T	G G	T T	G T	C C	A G	C C	A A	A A	A A	G G
Control	C T	C T	T T	C G	A G	A T	A G	C C	A G	C T	G G	C T	A G	C T	A G	A T	A G	C G
Control	T T	T T	T T	G G	G G	T T	G G	C T	G G	T T	G T	C C	A G	C C	A A	A A	A A	G G
Control	T T	T T	T T	G G	G G	T T	G G	T T	G G	T T	T T	C C	G G	C C	A A	A A	A A	G G
Control	T T	T T	T T	G G	G G	T T	G G	T T	G G	T T	T T	C C	G G	C C	A A	A A	A A	G G
Control	T T	T T	T T	G G	G G	T T	G G	T T	G G	T T	T T	C C	G G	C C	A A	A A	A A	G G
Control	T T	T T	T T	G G	G G	T T	G G	C T	G G	T T	G T	C C	A G	C C	A A	A A	A A	G G
Control	T T	T T	T T	G G	G G	T T	G G	C T	G G	T T	G T	C C	A G	C C	A A	A A	A A	G G
Control	T T	T T	T T	G G	G G	T T	G G	T T	G G	T T	T T	C C	G G	C C	A A	A A	A A	G G
Control	C T	C T	T T	C G	A G	A T	A G	C T	A G	C T	G T	C T	G G	C T	A G	A T	A G	C G
Control	T T	T T	T T	G G	G G	T T	G G	C T	G G	T T	G T	C C	A G	C C	A A	A A	A A	G G
Control	T T	T T	T T	G G	G G	T T	G G	C T	G G	T T	G T	C C	A G	C C	A A	A A	A A	G G
Control	T T	T T	T T	G G	G G	T T	G G	T T	G G	T T	T T	C C	G G	C C	A A	A A	A A	G G
Control	T T	T T	T T	G G	G G	T T	G G	C T	G G	T T	G T	C C	A G	C C	A A	A A	A A	G G
Control	C T	C T	T T	C G	A G	A T	A G	C T	A G	C T	G T	C T	G G	C T	A G	A T	A G	C G
Control	T T	T T	T T	G G	G G	T T	G G	T T	G G	T T	T T	C C	G G	C C	A A	A A	A A	G G
Control	T T	T T	T T	G G	G G	T T	G G	C T	G G	T T	G T	C C	A G	C C	A A	A A	A A	G G
Control	T T	T T	T T	G G	G G	T T	G G	C T	G G	T T	G T	C C	A G	C C	A A	A A	A A	G G
Control	T T	T T	T T	G G	G G	T T	G G	C T	G G	T T	G T	C C	A G	C C	A A	A A	A A	G G
Control	T T	T T	T T	G G	G G	T T	G G	T T	G G	T T	T T	C C	G G	C C	A A	A A	A A	G G
Control	T T	T T	T T	G G	G G	T T	G G	T T	G G	T T	T T	C C	G G	C C	A A	A A	A A	G G
Control	T T	T T	T T	G G	G G	T T	G G	C T	G G	T T	G T	C C	A G	C C	A A	A A	A A	G G
Control	T T	T T	T T	G G	G G	T T	G G	T T	G G	T T	T T	C C	G G	C C	A A	A A	A A	G G
Control	T T	T T	T T	G G	G G	T T	G G	T T	G G	T T	T T	C C	G G	C C	A A	A A	A A	G G
Control	T T	T T	T T	G G	G G	T T	G G	C T	G G	T T	G T	C C	A G	C C	A A	A A	A A	G G
Control	T T	T T	T T	G G	G G	T T	G G	T T	G G	T T	T T	C C	G G	C C	A A	A A	A A	G G
Control	T T	T T	T T	G G	G G	T T	G G	T T	G G	T T	T T	C C	G G	C C	A A	A A	A A	G G
Control	C T	C T	T T	C G	A G	A T	A G	C C	A G	C T	G G	C T	A G	C T	A G	A T	A G	C G
Control	T T	T T	T T	G G	G G	T T	G G	T T	G G	T T	T T	C C	G G	C C	A A	A A	A A	G G
Control	T T	T T	T T	G G	G G	T T	G G	T T	G G	T T	T T	C C	G G	C C	A A	A A	A A	G G
Control	T T	T T	T T	G G	G G	T T	G G	C T	G G	T T	G T	C C	A G	C C	A A	A A	A A	G G
Control	T T	T T	T T	G G	G G	T T	G G	T T	G G	T T	T T	C C	G G	C C	A A	A A	A A	G G
Control	C T	T T	0 0	C G	A G	A T	A G	C T	A G	C T	G T	C T	G G	C T	A G	A T	A G	C G
Control	T T	T T	T T	G G	G G	T T	G G	T T	G G	T T	T T	C C	G G	C C	A A	A A	A A	G G
Control	C T	T T	C T	C G	A G	A T	A G	C T	A G	C T	G T	C T	G G	C T	A G	A T	A G	C G
Control	C T	C T	T T	C G	A G	A T	A G	C C	A G	C T	G G	C T	A G	C T	A G	A T	A G	C G
Control	T T	T T	T T	G G	G G	T T	G G	T T	G G	T T	T T	C C	G G	C C	A A	A A	A A	G G
Control	T T	T T	T T	G G	G G	T T	G G	C T	G G	T T	G T	C C	A G	C C	A A	A A	A A	G G
Control	T T	T T	T T	G G	G G	T T	G G	T T	G G	T T	T T	C C	G G	C C	A A	A A	A A	G G
Control	T T	T T	T T	G G	G G	T T	G G	T T	G G	T T	T T	C C	G G	C C	A A	A A	A A	G G
Control	C T	C T	T T	C G	A G	A T	A G	C T	A G	C T	G T	C T	G G	C T	A G	A T	A G	C G
Control	T T	T T	T T	G G	G G	T T	G G	C T	G G	T T	G T	C C	A G	C C	A A	A A	A A	G G
Control	C T	C T	T T	C G	A G	A T	A G	C T	A G	C T	G T	C T	G G	C T	A G	A T	A G	C G
Control	T T	T T	T T	G G	G G	T T	G G	T T	G G	T T	T T	C C	G G	C C	A A	A A	A A	G G
Control	T T	T T	T T	G G	G G	T T	G G	C T	G G	T T	G T	C C	A G	C C	A A	A A	A A	G G
Control	C T	C T	T T	C G	A G	A T	A G	C C	A G	C T	G G	C T	A G	C T	A G	A T	A G	C G
Control	T T	T T	T T	G G	G G	T T	G G	T T	G G	T T	T T	C C	G G	C C	A A	A A	A A	G G
Control	C T	T T	C T	C G	A G	A T	A G	C T	A G	C T	G T	C T	G G	C T	A G	A T	A G	C G
Control	T T	T T	T T	G G	G G	T T	G G	T T	G G	T T	T T	C C	G G	C C	A A	A A	A A	G G
Control	T T	T T	T T	G G	G G	T T	G G	C T	G G	T T	G T	C C	A G	C C	A A	A A	A A	G G
Control	C T	C T	T T	C G	A G	A T	A G	C T	A G	C T	G T	C T	G G	C T	A G	A T	A G	C G
Control	T T	T T	T T	G G	G G	T T	G G	C T	G G	T T	G T	C C	A G	C C	A A	A A	A A	G G
Control	T T	T T	T T	G G	G G	T T	G G	C T	G G	T T	G T	C C	A G	C C	A A	A A	A A	G G
Control	T T	T T	T T	G G	G G	T T	G G	C T	G G	T T	G T	C C	A G	C C	A A	A A	A A	G G
Control	T T	T T	T T	G G	G G	T T	G G	T T	G G	T T	T T	C C	G G	C C	A A	A A	A A	G G
Control	T T	T T	T T	G G	G G	T T	G G	T T	G G	T T	T T	C C	G G	C C	A A	A A	A A	G G
Control	C C	C T	C T	C C	A A	A A	A A	C C	A A	C C	G G	T T	G G	T T	G G	T T	G G	C C
Control	T T	T T	T T	G G	G G	T T	G G	T T	G G	T T	T T	C C	G G	C C	A A	A A	A A	G G
Control	T T	T T	T T	G G	G G	T T	G G	C T	G G	T T	G T	C C	A G	C C	A A	A A	A A	G G
Control	C T	C T	T T	C G	A G	A T	A G	C C	A G	C T	G G	C T	A G	C T	A G	A T	A G	C G
Control	T T	T T	T T	G G	G G	T T	G G	T T	G G	T T	T T	C C	G G	C C	A A	A A	A A	G G
Control	T T	T T	T T	G G	G G	T T	G G	C T	G G	T T	G T	C C	A G	C C	A A	A A	A A	G G
Control	T T	T T	T T	G G	G G	T T	G G	T T	G G	T T	T T	C C	G G	C C	A A	A A	A A	G G
Control	C T	T T	C T	C G	A G	A T	A G	C T	A G	C T	G T	C T	G G	C T	A G	A T	A G	C G
Control	T T	T T	T T	G G	G G	T T	G G	T T	G G	T T	T T	C C	G G	C C	A A	A A	A A	G G
Control	T T	T T	T T	G G	G G	T T	G G	C T	G G	T T	G T	C C	A G	C C	A A	A A	A A	G G
Control	T T	T T	T T	G G	G G	T T	G G	T T	G G	T T	T T	C C	G G	C C	A A	A A	A A	G G
Control	T T	T T	T T	G G	G G	T T	G G	C T	G G	T T	G T	C C	A G	C C	A A	A A	A A	G G
Control	T T	T T	T T	G G	G G	T T	G G	C T	G G	T T	G T	C C	A G	C C	A A	A A	A A	G G
Control	T T	T T	T T	G G	G G	T T	G G	T T	G G	T T	T T	C C	G G	C C	A A	A A	A A	G G
Control	T T	T T	T T	G G	G G	T T	G G	T T	G G	T T	T T	C C	G G	C C	A A	A A	A A	G G
Control	T T	T T	T T	G G	G G	T T	G G	C T	G G	T T	G T	C C	A G	C C	A A	A A	A A	G G
Control	T T	T T	T T	G G	G G	T T	G G	C T	G G	T T	G T	C C	A G	C C	A A	A A	A A	G G
Control	T T	T T	T T	G G	G G	T T	G G	C T	G G	T T	G T	C C	A G	C C	A A	A A	A A	G G
Control	T T	T T	T T	G G	G G	T T	G G	T T	G G	T T	T T	C C	G G	C C	A A	A A	A A	G G
Control	T T	T T	T T	G G	G G	T T	G G	T T	G G	T T	T T	C C	G G	C C	A A	A A	A A	G G
Control	C T	C T	T T	C G	A G	A T	A G	C T	A G	C T	G T	C T	G G	C T	A G	A T	A G	C G
Control	T T	T T	T T	G G	G G	T T	G G	C T	G G	T T	G T	C C	A G	C C	A A	A A	A A	G G
Control	T T	T T	T T	G G	G G	T T	G G	T T	G G	T T	T T	C C	G G	C C	A A	A A	A A	G G
Control	T T	T T	T T	G G	G G	T T	G G	C T	G G	T T	G T	C C	A G	C C	A A	A A	A A	G G
Control	T T	T T	T T	G G	G G	T T	G G	C T	G G	T T	G T	C C	A G	C C	A A	A A	A A	G G
Control	C T	C T	T T	C G	A G	A T	A G	C C	A G	C T	G G	C T	A G	C T	A G	A T	A G	C G
Control	T T	T T	T T	G G	G G	T T	G G	T T	G G	T T	T T	C C	G G	C C	A A	A A	A A	G G
Control	T T	T T	T T	G G	G G	T T	G G	T T	G G	T T	T T	C C	G G	C C	A A	A A	A A	G G
Control	T T	T T	T T	G G	G G	T T	G G	C T	G G	T T	G T	C C	A G	C C	A A	A A	A A	G G
Control	C C	C T	C T	C C	A A	A A	A A	C C	A A	C C	G G	T T	G G	T T	G G	T T	G G	C C
Control	T T	T T	T T	G G	G G	T T	G G	C T	G G	T T	G T	C C	A G	C C	A A	A A	A A	G G
Control	T T	T T	T T	G G	G G	T T	G G	C T	G G	T T	G T	C C	A G	C C	A A	A A	A A	G G
Control	T T	T T	T T	G G	G G	T T	G G	C T	G G	T T	G T	C C	A G	C C	A A	A A	A A	G G
Control	C T	C T	T T	C G	A G	A T	A G	C C	A G	C T	G G	C T	A G	C T	A G	A T	A G	C G
Control	C T	C T	T T	C G	A G	A T	A G	C T	A G	C T	G T	C T	G G	C T	A G	A T	A G	C G
Control	T T	T T	T T	G G	G G	T T	G G	T T	G G	T T	T T	C C	G G	C C	A A	A A	A A	G G
Control	T T	T T	T T	G G	G G	T T	G G	T T	G G	T T	T T	C C	G G	C C	A A	A A	A A	G G
Control	T T	T T	T T	G G	G G	T T	G G	T T	G G	T T	T T	C C	G G	C C	A A	A A	A A	G G
Control	T T	T T	T T	G G	G G	T T	G G	C T	G G	T T	G T	C C	A G	C C	A A	A A	A A	G G
Control	T T	T T	T T	G G	G G	T T	G G	T T	G G	T T	T T	C C	G G	C C	A A	A A	A A	G G
Control	C T	C T	T T	C G	A G	A T	A G	C T	A G	C T	G T	C T	G G	C T	A G	A T	A G	C G
Control	T T	T T	T T	G G	G G	T T	G G	C T	G G	T T	G T	C C	A G	C C	A A	A A	A A	G G
Control	T T	T T	T T	G G	G G	T T	G G	T T	G G	T T	T T	C C	G G	C C	A A	A A	A A	G G
Control	T T	T T	T T	G G	G G	T T	G G	C T	G G	T T	G T	C C	A G	C C	A A	A A	A A	G G
Control	T T	T T	T T	G G	G G	T T	G G	C T	G G	T T	G T	C C	A G	C C	A A	A A	A A	G G
Control	T T	T T	T T	G G	G G	T T	G G	T T	G G	T T	T T	C C	G G	C C	A A	A A	A A	G G
Control	T T	T T	T T	G G	G G	T T	G G	C T	G G	T T	G T	C C	A G	C C	A A	A A	A A	G G
Control	T T	T T	T T	G G	G G	T T	G G	C T	G G	T T	G T	C C	A G	C C	A A	A A	A A	G G
Control	T T	T T	T T	G G	G G	T T	G G	C T	G G	T T	G T	C C	A G	C C	A A	A A	A A	G G
Control	T T	T T	T T	G G	G G	T T	G G	C T	G G	T T	G T	C C	A G	C C	A A	A A	A A	G G
Control	C T	C T	T T	C G	A G	A T	A G	C T	A G	C T	G T	C T	G G	C T	A G	A T	A G	C G
Control	C C	C T	C T	C C	A A	A A	A A	C C	A A	C C	G G	T T	G G	T T	G G	T T	G G	C C
Control	C T	C T	T T	C G	A G	A T	A G	C C	A G	C T	G G	C T	A G	C T	A G	A T	A G	C G
Control	T T	T T	T T	G G	G G	T T	G G	C T	G G	T T	G T	C C	A G	C C	A A	A A	A A	G G
Control	T T	T T	T T	G G	G G	T T	G G	T T	G G	T T	T T	C C	G G	C C	A A	A A	A A	G G
Control	T T	T T	T T	G G	G G	T T	G G	C T	G G	T T	G T	C C	A G	C C	A A	A A	A A	G G
Control	T T	T T	T T	G G	G G	T T	G G	C T	G G	T T	G T	C C	A G	C C	A A	A A	A A	G G
Control	T T	T T	T T	G G	G G	T T	G G	C T	G G	T T	G T	C C	A G	C C	A A	A A	A A	G G
Control	T T	T T	T T	G G	G G	T T	G G	C T	G G	T T	G T	C C	A G	C C	A A	A A	A A	G G
Control	T T	T T	T T	G G	G G	T T	G G	C T	G G	T T	G T	C C	A G	C C	A A	A A	A A	G G
Control	C T	C T	T T	C G	A G	A T	A G	C C	A G	C T	G G	C T	A G	C T	A G	A T	A G	C G
Control	T T	T T	T T	G G	G G	T T	G G	C T	G G	T T	G T	C C	A G	C C	A A	A A	A A	G G
Control	C T	C T	T T	C G	A G	A T	A G	C C	A G	C T	G G	C T	A G	C T	A G	A T	A G	C G
Control	T T	T T	T T	G G	G G	T T	G G	T T	G G	T T	T T	C C	G G	C C	A A	A A	A A	G G
Control	T T	T T	T T	G G	G G	T T	G G	T T	G G	T T	T T	C C	G G	C C	A A	A A	A A	G G
Control	T T	T T	T T	G G	G G	T T	G G	T T	G G	T T	T T	C C	G G	C C	A A	A A	A A	G G
Control	C T	C T	T T	C G	A G	A T	A G	C C	A G	C T	G G	C T	A G	C T	A G	A T	A G	C G
Control	T T	T T	T T	G G	G G	T T	G G	T T	G G	T T	T T	C C	G G	C C	A A	A A	A A	G G
Control	T T	T T	T T	G G	G G	T T	G G	T T	G G	T T	T T	C C	G G	C C	A A	A A	A A	G G
Control	T T	T T	T T	G G	G G	T T	G G	C T	G G	T T	G T	C C	A G	C C	A A	A A	A A	G G
Control	T T	T T	T T	G G	G G	T T	G G	C T	G G	T T	G T	C C	A G	C C	A A	A A	A A	G G
Control	T T	T T	T T	G G	G G	T T	G G	C T	G G	T T	G T	C C	A G	C C	A A	A A	A A	G G
Control	T T	T T	T T	G G	G G	T T	G G	T T	G G	T T	T T	C C	G G	C C	A A	A A	A A	G G
Control	C T	C T	T T	C G	A G	A T	A G	C T	A G	C T	G T	C T	G G	C T	A G	A T	A G	C G
Control	T T	T T	T T	G G	G G	T T	G G	T T	G G	T T	T T	C C	G G	C C	A A	A A	A A	G G
Control	C C	C C	T T	C C	A A	A A	A A	C C	A A	C C	G G	T T	G G	T T	G G	T T	G G	C C
Control	T T	T T	T T	G G	G G	T T	G G	T T	G G	T T	T T	C C	G G	C C	A A	A A	A A	G G
Control	T T	T T	T T	G G	G G	T T	G G	C T	G G	T T	G T	C C	A G	C C	A A	A A	A A	G G
Control	C T	T T	C T	C G	A G	A T	A G	C C	A G	C T	G G	C T	A G	C T	A G	A T	A G	C G
Control	T T	T T	T T	G G	G G	T T	G G	C T	G G	T T	G T	C C	A G	C C	A A	A A	A A	G G
Control	C T	T T	C T	C G	A G	A T	A G	C T	A G	C T	G T	C T	G G	C T	A G	A T	A G	C G
Control	T T	T T	T T	G G	G G	T T	G G	C T	G G	T T	G T	C C	A G	C C	A A	A A	A A	G G
Control	T T	T T	T T	G G	G G	T T	G G	T T	G G	T T	T T	C C	G G	C C	A A	A A	A A	G G
Control	T T	T T	T T	G G	G G	T T	G G	C T	G G	T T	G T	C C	A G	C C	A A	A A	A A	G G
Control	T T	T T	T T	G G	G G	T T	G G	C T	G G	T T	G T	C C	A G	C C	A A	A A	A A	G G
Control	C T	C T	T T	C G	A G	A T	A G	C T	A G	C T	G T	C T	G G	C T	A G	A T	A G	C G
Control	C T	T T	C T	C G	A G	A T	A G	C C	A G	C T	G G	C T	A G	C T	A G	A T	A G	C G
Control	C T	C T	T T	C G	A G	A T	A G	C C	A G	C T	G G	C T	A G	C T	A G	A T	A G	C G
Control	T T	T T	T T	G G	G G	T T	G G	T T	G G	T T	T T	C C	G G	C C	A A	A A	A A	G G
Control	C T	T T	C T	C G	A G	A T	A G	C T	A G	C T	G T	C T	G G	C T	A G	A T	A G	C G
Control	C C	C T	C T	C C	A A	A A	A A	C C	A A	C C	G G	T T	G G	T T	G G	T T	G G	C C
Control	T T	T T	T T	G G	G G	T T	G G	C T	G G	T T	G T	C C	A G	C C	A A	A A	A A	G G
Control	T T	T T	T T	G G	G G	T T	G G	C T	G G	T T	G T	C C	A G	C C	A A	A A	A A	G G
Control	T T	T T	T T	G G	G G	T T	G G	T T	G G	T T	T T	C C	G G	C C	A A	A A	A A	G G
Control	T T	T T	T T	G G	G G	T T	G G	C T	G G	T T	G T	C C	A G	C C	A A	A A	A A	G G
Control	T T	T T	T T	G G	G G	T T	G G	T T	G G	T T	T T	C C	G G	C C	A A	A A	A A	G G
Control	T T	T T	T T	G G	G G	T T	G G	C T	G G	T T	G T	C C	A G	C C	A A	A A	A A	G G
Control	T T	T T	T T	G G	G G	T T	G G	T T	G G	T T	T T	C C	G G	C C	A A	A A	A A	G G
Control	C T	T T	C T	C G	A G	A T	A G	C C	A G	C T	G G	C T	A G	C T	A G	A T	A G	C G
Control	C T	T T	C T	C G	A G	A T	A G	C C	A G	C T	G G	C T	A G	C T	A G	A T	A G	C G
Control	T T	T T	T T	G G	G G	T T	G G	T T	G G	T T	T T	C C	G G	C C	A A	A A	A A	G G
Control	T T	T T	T T	G G	G G	T T	G G	C C	G G	T T	G G	C C	A A	C C	A A	A A	A A	G G
Control	T T	T T	T T	G G	G G	T T	G G	T T	G G	T T	T T	C C	G G	C C	A A	A A	A A	G G
Control	T T	T T	T T	G G	G G	T T	G G	T T	G G	T T	T T	C C	G G	C C	A A	A A	A A	G G
Control	T T	T T	T T	G G	G G	T T	G G	C T	G G	T T	G T	C C	A G	C C	A A	A A	A A	G G
Control	T T	T T	T T	G G	G G	T T	G G	C T	G G	T T	G T	C C	A G	C C	A A	A A	A A	G G
Control	T T	T T	T T	G G	G G	T T	G G	T T	G G	T T	T T	C C	G G	C C	A A	A A	A A	G G
Control	T T	T T	T T	G G	G G	T T	G G	T T	G G	T T	T T	C C	G G	C C	A A	A A	A A	G G
Control	C T	C T	T T	C G	A G	A T	A G	C T	A G	C T	G T	C T	G G	C T	A G	A T	A G	C G
Control	T T	T T	T T	G G	G G	T T	G G	C T	G G	T T	G T	C C	A G	C C	A A	A A	A A	G G
Control	T T	T T	T T	G G	G G	T T	G G	C T	G G	T T	G T	C C	A G	C C	A A	A A	A A	G G
Control	C T	T T	C T	C G	A G	A T	A G	C T	A G	C T	G T	C T	G G	C T	A G	A T	A G	C G
Control	T T	T T	T T	G G	G G	T T	G G	C T	G G	T T	G T	C C	A G	C C	A A	A A	A A	G G
Control	T T	T T	T T	G G	G G	T T	G G	C T	G G	T T	G T	C C	A G	C C	A A	A A	A A	G G
Control	T T	T T	T T	G G	G G	T T	G G	T T	G G	T T	T T	C C	G G	C C	A A	A A	A A	G G
Control	T T	T T	T T	G G	G G	T T	G G	T T	G G	T T	T T	C C	G G	C C	A A	A A	A A	G G
Control	T T	T T	T T	G G	G G	T T	G G	C T	G G	T T	G T	C C	A G	C C	A A	A A	A A	G G
Control	C T	C T	T T	C G	A G	A T	A G	C T	A G	C T	G T	C T	G G	C T	A G	A T	A G	C G
Control	C T	T T	C T	C G	A G	A T	A G	C T	A G	C T	G T	C T	G G	C T	A G	A T	A G	C G
Control	T T	T T	T T	G G	G G	T T	G G	T T	G G	T T	T T	C C	G G	C C	A A	A A	A A	G G
Control	T T	T T	T T	G G	G G	T T	G G	C T	G G	T T	G T	C C	A G	C C	A A	A A	A A	G G
Control	T T	T T	T T	G G	G G	T T	G G	T T	G G	T T	T T	C C	G G	C C	A A	A A	A A	G G
Control	T T	T T	T T	G G	G G	T T	G G	C T	G G	T T	G T	C C	A G	C C	A A	A A	A A	G G
Control	T T	T T	T T	G G	G G	T T	G G	T T	G G	T T	T T	C C	G G	C C	A A	A A	A A	G G
Control	T T	T T	T T	G G	G G	T T	G G	T T	G G	T T	T T	C C	G G	C C	A A	A A	A A	G G
Control	C T	C T	T T	C G	A G	A T	A G	C T	A G	C T	G T	C T	G G	C T	A G	A T	A G	C G
Control	T T	T T	T T	G G	G G	T T	G G	C T	G G	T T	G T	C C	A G	C C	A A	A A	A A	G G
Control	T T	T T	T T	G G	G G	T T	G G	C T	G G	T T	G T	C C	A G	C C	A A	A A	A A	G G
Control	T T	T T	T T	G G	G G	T T	G G	T T	G G	T T	T T	C C	G G	C C	A A	A A	A A	G G
Control	T T	T T	T T	G G	G G	T T	G G	C T	G G	T T	G T	C C	A G	C C	A A	A A	A A	G G
Control	T T	T T	T T	G G	G G	T T	G G	C T	G G	T T	G T	C C	A G	C C	A A	A A	A A	G G
Control	C T	C T	T T	C G	A G	A T	A G	C C	A G	C T	G G	C T	A G	C T	A G	A T	A G	C G
Control	C T	C T	T T	C G	A G	A T	A G	C C	A G	C T	G G	C T	A G	C T	A G	A T	A G	C G
Control	C T	T T	C T	C G	A G	A T	A G	C C	A G	C T	G G	C T	A G	C T	A G	A T	A G	C G
Control	T T	T T	T T	G G	G G	T T	G G	T T	G G	T T	T T	C C	G G	C C	A A	A A	A A	G G
Control	T T	T T	T T	G G	G G	T T	G G	C T	G G	T T	G T	C C	A G	C C	A A	A A	A A	G G
Control	T T	T T	T T	G G	G G	T T	G G	T T	G G	T T	T T	C C	G G	C C	A A	A A	A A	G G
Control	T T	T T	T T	G G	G G	T T	G G	T T	G G	T T	T T	C C	G G	C C	A A	A A	A A	G G
Control	C T	T T	C T	C G	A G	A T	A G	C T	A G	C T	G T	C T	G G	C T	A G	A T	A G	C G
Control	T T	T T	T T	G G	G G	T T	G G	C T	G G	T T	G T	C C	A G	C C	A A	A A	A A	G G
Control	T T	T T	T T	G G	G G	T T	G G	T T	G G	T T	T T	C C	G G	C C	A A	A A	A A	G G
Control	C T	C T	T T	C G	A G	A T	A G	C T	A G	C T	G T	C T	G G	C T	A G	A T	A G	C G
Control	T T	T T	T T	G G	G G	T T	G G	T T	G G	T T	T T	C C	G G	C C	A A	A A	A A	G G
Control	T T	T T	T T	G G	G G	T T	G G	T T	G G	T T	T T	C C	G G	C C	A A	A A	A A	G G
Control	T T	T T	T T	G G	G G	T T	G G	T T	G G	T T	T T	C C	G G	C C	A A	A A	A A	G G
Control	C T	C T	T T	C G	A G	A T	A G	C T	A G	C T	G T	C T	G G	C T	A G	A T	A G	C G
Control	T T	T T	T T	G G	G G	T T	G G	C T	G G	T T	G T	C C	A G	C C	A A	A A	A A	G G
Control	T T	T T	T T	G G	G G	T T	G G	T T	G G	T T	T T	C C	G G	C C	A A	A A	A A	G G
Control	C T	C T	T T	C G	A G	A T	A G	C C	A G	C T	G G	C T	A G	C T	A G	A T	A G	C G
Control	T T	T T	T T	G G	G G	T T	G G	C T	G G	T T	G T	C C	A G	C C	A A	A A	A A	G G
Control	T T	T T	T T	G G	G G	T T	G G	C T	G G	T T	G T	C C	A G	C C	A A	A A	A A	G G
Control	T T	T T	T T	G G	G G	T T	G G	C C	G G	T T	G G	C C	A A	C C	A A	A A	A A	G G
Control	T T	T T	T T	G G	G G	T T	G G	C C	G G	T T	G G	C C	A A	C C	A A	A A	A A	G G
Control	T T	T T	T T	G G	G G	T T	G G	C T	G G	T T	G T	C C	A G	C C	A A	A A	A A	G G
Control	T T	T T	T T	G G	G G	T T	G G	T T	G G	T T	T T	C C	G G	C C	A A	A A	A A	G G
Control	T T	T T	T T	G G	G G	T T	G G	C T	G G	T T	G T	C C	A G	C C	A A	A A	A A	G G
Control	T T	T T	T T	G G	G G	T T	G G	T T	G G	T T	T T	C C	G G	C C	A A	A A	A A	G G
Control	T T	T T	T T	G G	G G	T T	G G	T T	G G	T T	T T	C C	G G	C C	A A	A A	A A	G G
Control	C T	C T	T T	C G	A G	A T	A G	C T	A G	C T	G T	C T	G G	C T	A G	A T	A G	C G
Control	T T	T T	T T	G G	G G	T T	G G	C T	G G	T T	G T	C C	A G	C C	A A	A A	A A	G G
Control	T T	T T	T T	G G	G G	T T	G G	T T	G G	T T	T T	C C	G G	C C	A A	A A	A A	G G
Control	C C	C T	C T	C C	A A	A A	A A	C C	A A	C C	G G	T T	G G	T T	G G	T T	G G	C C
Control	C T	C T	T T	C G	A G	A T	A G	C C	A G	C T	G G	C T	A G	C T	A G	A T	A G	C G
Control	T T	T T	T T	G G	G G	T T	G G	C T	G G	T T	G T	C C	A G	C C	A A	A A	A A	G G
Control	C T	T T	C T	C G	A G	A T	A G	C C	A G	C T	G G	C T	A G	C T	A G	A T	A G	C G
Control	T T	T T	T T	G G	G G	T T	G G	C C	G G	T T	G G	C C	A A	C C	A A	A A	A A	G G
Control	C T	T T	T T	C G	A G	A T	A G	C T	A G	C T	G T	C T	G G	C T	A G	A T	A G	C G
Control	T T	T T	T T	G G	G G	T T	G G	C T	G G	T T	G T	C C	A G	C C	A A	A A	A A	G G
Control	T T	T T	T T	G G	G G	T T	G G	T T	G G	T T	T T	C C	G G	C C	A A	A A	A A	G G
Control	C T	C T	T T	C G	A G	A T	A G	C T	A G	C T	G T	C T	G G	C T	A G	A T	A G	C G
Control	T T	T T	T T	G G	G G	T T	G G	T T	G G	T T	T T	C C	G G	C C	A A	A A	A A	G G
Control	T T	T T	T T	G G	G G	T T	G G	T T	G G	T T	T T	C C	G G	C C	A A	A A	A A	G G
Control	C T	C T	T T	C G	A G	A T	A G	C C	A G	C T	G G	C T	A G	C T	A G	A T	A G	C G
Control	T T	T T	T T	G G	G G	T T	G G	C T	G G	T T	G T	C C	A G	C C	A A	A A	A A	G G
Control	T T	T T	T T	G G	G G	T T	G G	C T	G G	T T	G T	C C	A G	C C	A A	A A	A A	G G
Control	T T	T T	T T	G G	G G	T T	G G	T T	G G	T T	T T	C C	G G	C C	A A	A A	A A	G G
Control	T T	T T	T T	G G	G G	T T	G G	T T	G G	T T	T T	C C	G G	C C	A A	A A	A A	G G
Control	C T	T T	C T	C G	A G	A T	A G	C C	A G	C T	G G	C T	A G	C T	A G	A T	A G	C G
Control	T T	T T	T T	G G	G G	T T	G G	C T	G G	T T	G T	C C	A G	C C	A A	A A	A A	G G
Control	T T	T T	T T	G G	G G	T T	G G	T T	G G	T T	T T	C C	G G	C C	A A	A A	A A	G G
Control	C T	T T	C T	C G	A G	A T	A G	C T	A G	C T	G T	C T	G G	C T	A G	A T	A G	C G
Control	T T	T T	T T	G G	G G	T T	G G	C C	G G	T T	G G	C C	A A	C C	A A	A A	A A	G G
Control	T T	T T	T T	G G	G G	T T	G G	C T	G G	T T	G T	C C	A G	C C	A A	A A	A A	G G
Control	T T	T T	T T	G G	G G	T T	G G	T T	G G	T T	T T	C C	G G	C C	A A	A A	A A	G G
Control	T T	T T	T T	G G	G G	T T	G G	C C	G G	T T	G G	C C	A A	C C	A A	A A	A A	G G
Control	T T	T T	T T	G G	G G	T T	G G	T T	G G	T T	T T	C C	G G	C C	A A	A A	A A	G G
Control	T T	T T	T T	G G	G G	T T	G G	C T	G G	T T	G T	C C	A G	C C	A A	A A	A A	G G
Control	C T	C T	T T	C G	A G	A T	A G	C C	A G	C T	G G	C T	A G	C T	A G	A T	A G	C G
Control	T T	T T	T T	G G	G G	T T	G G	T T	G G	T T	T T	C C	G G	C C	A A	A A	A A	G G
Control	T T	T T	T T	G G	G G	T T	G G	C T	G G	T T	G T	C C	A G	C C	A A	A A	A A	G G
Control	T T	T T	T T	G G	G G	T T	G G	T T	G G	T T	T T	C C	G G	C C	A A	A A	A A	G G
Control	C T	C T	T T	C G	A G	A T	A G	C C	A G	C T	G G	C T	A G	C T	A G	A T	A G	C G
Control	T T	T T	T T	G G	G G	T T	G G	T T	G G	T T	T T	C C	G G	C C	A A	A A	A A	G G
Control	T T	T T	T T	G G	G G	T T	G G	C C	G G	T T	G G	C C	A A	C C	A A	A A	A A	G G
Control	C T	T T	C T	C G	A G	A T	A G	C C	A G	C T	G G	C T	A G	C T	A G	A T	A G	C G
Control	C T	T T	C T	C G	A G	A T	A G	C T	A G	C T	G T	C T	G G	C T	A G	A T	A G	C G
Control	C C	C T	C T	C C	A A	A A	A A	C C	A A	C C	G G	T T	G G	T T	G G	T T	G G	C C
Control	T T	T T	T T	G G	G G	T T	G G	T T	G G	T T	T T	C C	G G	C C	A A	A A	A A	G G
Control	T T	T T	T T	G G	G G	T T	G G	T T	G G	T T	T T	C C	G G	C C	A A	A A	A A	G G
Control	T T	T T	T T	G G	G G	T T	G G	C T	G G	T T	G T	C C	A G	C C	A A	A A	A A	G G
Control	T T	T T	T T	G G	G G	T T	G G	C T	G G	T T	G T	C C	A G	C C	A A	A A	A A	G G
Control	T T	T T	T T	G G	G G	T T	G G	C T	G G	T T	G T	C C	A G	C C	A A	A A	A A	G G
Control	C C	C C	T T	C C	A A	A A	A A	C C	A A	C C	G G	T T	G G	T T	G G	T T	G G	C C
Control	T T	T T	T T	G G	G G	T T	G G	C T	G G	T T	G T	C C	A G	C C	A A	A A	A A	G G
Control	T T	T T	T T	G G	G G	T T	G G	C T	G G	T T	G T	C C	A G	C C	A A	A A	A A	G G
Control	T T	T T	T T	G G	G G	T T	G G	C C	G G	T T	G G	C C	A A	C C	A A	A A	A A	G G
Control	T T	T T	T T	G G	G G	T T	G G	T T	G G	T T	T T	C C	G G	C C	A A	A A	A A	G G
Control	T T	T T	T T	G G	G G	T T	G G	T T	G G	T T	T T	C C	G G	C C	A A	A A	A A	G G
Control	T T	T T	T T	G G	G G	T T	G G	C T	G G	T T	G T	C C	A G	C C	A A	A A	A A	G G
Control	T T	T T	T T	G G	G G	T T	G G	T T	G G	T T	T T	C C	G G	C C	A A	A A	A A	G G
Control	T T	T T	T T	G G	G G	T T	G G	T T	G G	T T	T T	C C	G G	C C	A A	A A	A A	G G
Control	T T	T T	T T	G G	G G	T T	G G	C T	G G	T T	G T	C C	A G	C C	A A	A A	A A	G G
Control	T T	T T	T T	G G	G G	T T	G G	C T	G G	T T	G T	C C	A G	C C	A A	A A	A A	G G
Control	C T	T T	C T	C G	A G	A T	A G	C T	A G	C T	G T	C T	G G	C T	A G	A T	A G	C G
Control	T T	T T	T T	G G	G G	T T	G G	T T	G G	T T	T T	C C	G G	C C	A A	A A	A A	G G
Control	T T	T T	T T	G G	G G	T T	G G	T T	G G	T T	T T	C C	G G	C C	A A	A A	A A	G G
Control	C T	T T	C T	C G	A G	A T	A G	C T	A G	C T	G T	C T	G G	C T	A G	A T	A G	C G
Control	T T	T T	T T	G G	G G	T T	G G	C T	G G	T T	G T	C C	A G	C C	A A	A A	A A	G G
Control	T T	T T	T T	G G	G G	T T	G G	C T	G G	T T	G T	C C	A G	C C	A A	A A	A A	G G
Control	T T	T T	T T	G G	G G	T T	G G	C T	G G	T T	G T	C C	A G	C C	A A	A A	A A	G G
Control	T T	T T	T T	G G	G G	T T	G G	C C	G G	T T	G G	C C	A A	C C	A A	A A	A A	G G
Control	C T	C T	T T	C G	A G	A T	A G	C T	A G	C T	G T	C T	G G	C T	A G	A T	A G	C G
Control	T T	T T	T T	G G	G G	T T	G G	C T	G G	T T	G T	C C	A G	C C	A A	A A	A A	G G
Control	T T	T T	T T	G G	G G	T T	G G	T T	G G	T T	T T	C C	G G	C C	A A	A A	A A	G G
Control	T T	T T	T T	G G	G G	T T	G G	C T	G G	T T	G T	C C	A G	C C	A A	A A	A A	G G
Control	T T	T T	T T	G G	G G	T T	G G	T T	G G	T T	T T	C C	G G	C C	A A	A A	A A	G G
Control	T T	T T	T T	G G	G G	T T	G G	C T	G G	T T	G T	C C	A G	C C	A A	A A	A A	G G
Control	T T	T T	T T	G G	G G	T T	G G	T T	G G	T T	T T	C C	G G	C C	A A	A A	A A	G G
Control	T T	T T	T T	G G	G G	T T	G G	C T	G G	T T	G T	C C	A G	C C	A A	A A	A A	G G
Control	T T	T T	T T	G G	G G	T T	G G	T T	G G	T T	T T	C C	G G	C C	A A	A A	A A	G G
Control	T T	T T	T T	G G	G G	T T	G G	C T	G G	T T	G T	C C	A G	C C	A A	A A	A A	G G
Control	T T	T T	T T	G G	G G	T T	G G	T T	G G	T T	T T	C C	G G	C C	A A	A A	A A	G G
Control	T T	T T	T T	G G	G G	T T	G G	T T	G G	T T	T T	C C	G G	C C	A A	A A	A A	G G
Control	T T	T T	T T	G G	G G	T T	G G	C C	G G	T T	G G	C C	A A	C C	A A	A A	A A	G G
Control	C T	T T	C T	C G	A G	A T	A G	C C	A G	C T	G G	C T	A G	C T	A G	A T	A G	C G
Control	T T	T T	T T	G G	G G	T T	G G	C C	G G	T T	G G	C C	A A	C C	A A	A A	A A	G G
Control	T T	T T	T T	G G	G G	T T	G G	T T	G G	T T	T T	C C	G G	C C	A A	A A	A A	G G
Control	T T	T T	T T	G G	G G	T T	G G	C T	G G	T T	G T	C C	A G	C C	A A	A A	A A	G G
Control	T T	T T	T T	G G	G G	T T	G G	T T	G G	T T	T T	C C	G G	C C	A A	A A	A A	G G
Control	T T	T T	T T	G G	G G	T T	G G	T T	G G	T T	T T	C C	G G	C C	A A	A A	A A	G G
Control	T T	T T	T T	G G	G G	T T	G G	C T	G G	T T	G T	C C	A G	C C	A A	A A	A A	G G
Control	T T	T T	T T	G G	G G	T T	G G	C T	G G	T T	G T	C C	A G	C C	A A	A A	A A	G G
Control	C T	C T	T T	C G	A G	A T	A G	C C	A G	C T	G G	C T	A G	C T	A G	A T	A G	C G
Control	T T	T T	T T	G G	G G	T T	G G	T T	G G	T T	T T	C C	G G	C C	A A	A A	A A	G G
Control	T T	T T	T T	G G	G G	T T	G G	T T	G G	T T	T T	C C	G G	C C	A A	A A	A A	G G
Control	T T	T T	T T	G G	G G	T T	G G	T T	G G	T T	T T	C C	G G	C C	A A	A A	A A	G G
Control	T T	T T	T T	G G	G G	T T	G G	C T	G G	T T	G T	C C	A G	C C	A A	A A	A A	G G
Control	T T	T T	T T	G G	G G	T T	G G	T T	G G	T T	T T	C C	G G	C C	A A	A A	A A	G G
Control	T T	T T	T T	G G	G G	T T	G G	T T	G G	T T	T T	C C	G G	C C	A A	A A	A A	G G
Control	T T	T T	T T	G G	G G	T T	G G	T T	G G	T T	T T	C C	G G	C C	A A	A A	A A	G G
Control	T T	T T	T T	G G	G G	T T	G G	T T	G G	T T	T T	C C	G G	C C	A A	A A	A A	G G
Control	C T	C T	T T	C G	A G	A T	A G	C C	A G	C T	G G	C T	A G	C T	A G	A T	A G	C G
Control	C T	C T	T T	C G	A G	A T	A G	C T	A G	C T	G T	C T	G G	C T	A G	A T	A G	C G
Control	T T	T T	T T	G G	G G	T T	G G	T T	G G	T T	T T	C C	G G	C C	A A	A A	A A	G G
Control	T T	T T	T T	G G	G G	T T	G G	T T	G G	T T	T T	C C	G G	C C	A A	A A	A A	G G
Control	T T	T T	T T	G G	G G	T T	G G	C T	G G	T T	G T	C C	A G	C C	A A	A A	A A	G G
Control	C T	C T	T T	C G	A G	A T	A G	C T	A G	C T	G T	C T	G G	C T	A G	A T	A G	C G
Control	C T	T T	C T	C G	A G	A T	A G	C C	A G	C T	G G	C T	A G	C T	A G	A T	A G	C G
Control	T T	T T	T T	G G	G G	T T	G G	T T	G G	T T	T T	C C	G G	C C	A A	A A	A A	G G
Control	T T	T T	T T	G G	G G	T T	G G	T T	G G	T T	T T	C C	G G	C C	A A	A A	A A	G G
Control	T T	T T	T T	G G	G G	T T	G G	T T	G G	T T	T T	C C	G G	C C	A A	A A	A A	G G
Control	T T	T T	T T	G G	G G	T T	G G	T T	G G	T T	T T	C C	G G	C C	A A	A A	A A	G G
Control	T T	T T	T T	G G	G G	T T	G G	C T	G G	T T	G T	C C	A G	C C	A A	A A	A A	G G
Control	T T	T T	T T	G G	G G	T T	G G	C T	G G	T T	G T	C C	A G	C C	A A	A A	A A	G G
Control	T T	T T	T T	G G	G G	T T	G G	T T	G G	T T	T T	C C	G G	C C	A A	A A	A A	G G
Control	T T	T T	T T	G G	G G	T T	G G	C T	G G	T T	G T	C C	A G	C C	A A	A A	A A	G G
Control	T T	T T	T T	G G	G G	T T	G G	T T	G G	T T	T T	C C	G G	C C	A A	A A	A A	G G
Control	T T	T T	T T	G G	G G	T T	G G	T T	G G	T T	T T	C C	G G	C C	A A	A A	A A	G G
Control	T T	T T	T T	G G	G G	T T	G G	C T	G G	T T	G T	C C	A G	C C	A A	A A	A A	G G
Control	T T	T T	T T	G G	G G	T T	G G	T T	G G	T T	T T	C C	G G	C C	A A	A A	A A	G G
Control	C T	C T	T T	C G	A G	A T	A G	C T	A G	C T	G T	C T	G G	C T	A G	A T	A G	C G
Control	T T	T T	T T	G G	G G	T T	G G	C T	G G	T T	G T	C C	A G	C C	A A	A A	A A	G G
Control	T T	T T	T T	G G	G G	T T	G G	C C	G G	T T	G G	C C	A A	C C	A A	A A	A A	G G
Control	T T	T T	T T	G G	G G	T T	G G	C T	G G	T T	G T	C C	A G	C C	A A	A A	A A	G G
Control	T T	T T	T T	G G	G G	T T	G G	C T	G G	T T	G T	C C	A G	C C	A A	A A	A A	G G
Control	C T	T T	C T	C G	A G	A T	A G	C C	A G	C T	G G	C T	A G	C T	A G	A T	A G	C G
Control	T T	T T	T T	G G	G G	T T	G G	C C	G G	T T	G G	C C	A A	C C	A A	A A	A A	G G
Control	T T	T T	T T	G G	G G	T T	G G	C T	G G	T T	G T	C C	A G	C C	A A	A A	A A	G G
Control	C T	C T	T T	C G	A G	A T	A G	C C	A G	C T	G G	C T	A G	C T	A G	A T	A G	C G
Control	T T	T T	T T	G G	G G	T T	G G	C T	G G	T T	G T	C C	A G	C C	A A	A A	A A	G G
Control	T T	T T	T T	G G	G G	T T	G G	C T	G G	T T	G T	C C	A G	C C	A A	A A	A A	G G
Control	T T	T T	T T	G G	G G	T T	G G	C T	G G	T T	G T	C C	A G	C C	A A	A A	A A	G G
Control	C T	T T	C T	C G	A G	A T	A G	C C	A G	C T	G G	C T	A G	C T	A G	A T	A G	C G
Control	T T	T T	T T	G G	G G	T T	G G	C T	G G	T T	G T	C C	A G	C C	A A	A A	A A	G G
Control	C T	C T	T T	C G	A G	A T	A G	C C	A G	C T	G G	C T	A G	C T	A G	A T	A G	C G
Control	T T	T T	T T	G G	G G	T T	G G	C T	G G	T T	G T	C C	A G	C C	A A	A A	A A	G G
Control	T T	T T	T T	G G	G G	T T	G G	C T	G G	T T	G T	C C	A G	C C	A A	A A	A A	G G
Control	C T	C T	T T	C G	A G	A T	A G	C C	A G	C T	G G	C T	A G	C T	A G	A T	A G	C G
Control	T T	T T	T T	G G	G G	T T	G G	C C	G G	T T	G G	C C	A A	C C	A A	A A	A A	G G
Control	C T	C T	T T	C G	A G	A T	A G	C C	A G	C T	G G	C T	A G	C T	A G	A T	A G	C G
Control	C T	T T	C T	C G	A G	A T	A G	C C	A G	C T	G G	C T	A G	C T	A G	A T	A G	C G
Control	T T	T T	T T	G G	G G	T T	G G	C T	G G	T T	G T	C C	A G	C C	A A	A A	A A	G G
Control	T T	T T	T T	G G	G G	T T	G G	C T	G G	T T	G T	C C	A G	C C	A A	A A	A A	G G
Control	T T	T T	T T	G G	G G	T T	G G	C T	G G	T T	G T	C C	A G	C C	A A	A A	A A	G G
Control	T T	T T	T T	G G	G G	T T	G G	C T	G G	T T	G T	C C	A G	C C	A A	A A	A A	G G
Control	T T	T T	T T	G G	G G	T T	G G	C T	G G	T T	G T	C C	A G	C C	A A	A A	A A	G G
Control	T T	T T	T T	G G	G G	T T	G G	C T	G G	T T	G T	C C	A G	C C	A A	A A	A A	G G
Control	T T	T T	T T	G G	G G	T T	G G	C T	G G	T T	G T	C C	A G	C C	A A	A A	A A	G G
Control	T T	T T	T T	G G	G G	T T	G G	C T	G G	T T	G T	C C	A G	C C	A A	A A	A A	G G
Control	T T	T T	T T	G G	G G	T T	G G	C T	G G	T T	G T	C C	A G	C C	A A	A A	A A	G G
Control	T T	T T	T T	G G	G G	T T	G G	C T	G G	T T	G T	C C	A G	C C	A A	A A	A A	G G
Control	T T	T T	T T	G G	G G	T T	G G	C T	G G	T T	G T	C C	A G	C C	A A	A A	A A	G G
Control	T T	T T	T T	G G	G G	T T	G G	C T	G G	T T	G T	C C	A G	C C	A A	A A	A A	G G
Control	T T	T T	T T	G G	G G	T T	G G	C C	G G	T T	G G	C C	A A	C C	A A	A A	A A	G G
Control	T T	T T	T T	G G	G G	T T	G G	C C	G G	T T	G G	C C	A A	C C	A A	A A	A A	G G
Control	T T	T T	T T	G G	G G	T T	G G	C T	G G	T T	G T	C C	A G	C C	A A	A A	A A	G G
Control	C T	T T	C T	C G	A G	A T	A G	C C	A G	C T	G G	C T	A G	C T	A G	A T	A G	C G
Control	T T	T T	T T	G G	G G	T T	G G	C T	G G	T T	G T	C C	A G	C C	A A	A A	A A	G G
Control	T T	T T	T T	G G	G G	T T	G G	C T	G G	T T	G T	C C	A G	C C	A A	A A	A A	G G
Control	T T	T T	T T	G G	G G	T T	G G	C T	G G	T T	G T	C C	A G	C C	A A	A A	A A	G G
Control	T T	T T	T T	G G	G G	T T	G G	C C	G G	T T	G G	C C	A A	C C	A A	A A	A A	G G
Control	T T	T T	T T	G G	G G	T T	G G	C C	G G	T T	G G	C C	A A	C C	A A	A A	A A	G G
Control	T T	T T	T T	G G	G G	T T	G G	C T	G G	T T	G T	C C	A G	C C	A A	A A	A A	G G
Control	C T	C T	T T	C G	A G	A T	A G	C C	A G	C T	G G	C T	A G	C T	A G	A T	A G	C G
Control	T T	T T	T T	G G	G G	T T	G G	C T	G G	T T	G T	C C	A G	C C	A A	A A	A A	G G
Control	T T	T T	T T	G G	G G	T T	G G	C T	G G	T T	G T	C C	A G	C C	A A	A A	A A	G G
Control	T T	T T	T T	G G	G G	T T	G G	C T	G G	T T	G T	C C	A G	C C	A A	A A	A A	G G
Control	T T	T T	T T	G G	G G	T T	G G	C C	G G	T T	G G	C C	A A	C C	A A	A A	A A	G G
Control	T T	T T	T T	G G	G G	T T	G G	C T	G G	T T	G T	C C	A G	C C	A A	A A	A A	G G
Control	T T	T T	T T	G G	G G	T T	G G	C T	G G	T T	G T	C C	A G	C C	A A	A A	A A	G G
Control	T T	T T	T T	G G	G G	T T	G G	C T	G G	T T	G T	C C	A G	C C	A A	A A	A A	G G
Control	T T	T T	T T	G G	G G	T T	G G	C T	G G	T T	G T	C C	A G	C C	A A	A A	A A	G G
Control	T T	T T	T T	G G	G G	T T	G G	C C	G G	T T	G G	C C	A A	C C	A A	A A	A A	G G
Control	T T	T T	T T	G G	G G	T T	G G	C T	G G	T T	G T	C C	A G	C C	A A	A A	A A	G G
Control	T T	T T	T T	G G	G G	T T	G G	C T	G G	T T	G T	C C	A G	C C	A A	A A	A A	G G
Control	T T	T T	T T	G G	G G	T T	G G	C T	G G	T T	G T	C C	A G	C C	A A	A A	A A	G G
Control	C T	T T	C T	C G	A G	A T	A G	C C	A G	C T	G G	C T	A G	C T	A G	A T	A G	C G
Control	T T	T T	T T	G G	G G	T T	G G	C T	G G	T T	G T	C C	A G	C C	A A	A A	A A	G G
Control	T T	T T	T T	G G	G G	T T	G G	C T	G G	T T	G T	C C	A G	C C	A A	A A	A A	G G
Control	T T	T T	T T	G G	G G	T T	G G	C T	G G	T T	G T	C C	A G	C C	A A	A A	A A	G G
Control	T T	T T	T T	G G	G G	T T	G G	C T	G G	T T	G T	C C	A G	C C	A A	A A	A A	G G
Control	T T	T T	T T	G G	G G	T T	G G	C T	G G	T T	G T	C C	A G	C C	A A	A A	A A	G G
Control	T T	T T	T T	G G	G G	T T	G G	C T	G G	T T	G T	C C	A G	C C	A A	A A	A A	G G
Control	T T	T T	T T	G G	G G	T T	G G	C T	G G	T T	G T	C C	A G	C C	A A	A A	A A	G G
Control	T T	T T	T T	G G	G G	T T	G G	C T	G G	T T	G T	C C	A G	C C	A A	A A	A A	G G
Control	T T	T T	T T	G G	G G	T T	G G	C T	G G	T T	G T	C C	A G	C C	A A	A A	A A	G G
Control	T T	T T	T T	G G	G G	T T	G G	C T	G G	T T	G T	C C	A G	C C	A A	A A	A A	G G
Control	T T	T T	T T	G G	G G	T T	G G	C T	G G	T T	G T	C C	A G	C C	A A	A A	A A	G G
Control	T T	T T	T T	G G	G G	T T	G G	C T	G G	T T	G T	C C	A G	C C	A A	A A	A A	G G
Control	T T	T T	T T	G G	G G	T T	G G	C T	G G	T T	G T	C C	A G	C C	A A	A A	A A	G G
Control	T T	T T	T T	G G	G G	T T	G G	C T	G G	T T	G T	C C	A G	C C	A A	A A	A A	G G
Control	T T	T T	T T	G G	G G	T T	G G	C T	G G	T T	G T	C C	A G	C C	A A	A A	A A	G G
Control	T T	T T	T T	G G	G G	T T	G G	C T	G G	T T	G T	C C	A G	C C	A A	A A	A A	G G
Control	T T	T T	T T	G G	G G	T T	G G	C T	G G	T T	G T	C C	A G	C C	A A	A A	A A	G G
Control	C T	C T	T T	C G	A G	A T	A G	C C	A G	C T	G G	C T	A G	C T	A G	A T	A G	C G
Control	T T	T T	T T	G G	G G	T T	G G	C T	G G	T T	G T	C C	A G	C C	A A	A A	A A	G G
Control	T T	T T	T T	G G	G G	T T	G G	C T	G G	T T	G T	C C	A G	C C	A A	A A	A A	G G
Control	T T	T T	T T	G G	G G	T T	G G	C T	G G	T T	G T	C C	A G	C C	A A	A A	A A	G G
Control	T T	T T	T T	G G	G G	T T	G G	C T	G G	T T	G T	C C	A G	C C	A A	A A	A A	G G
Control	T T	T T	T T	G G	G G	T T	G G	C T	G G	T T	G T	C C	A G	C C	A A	A A	A A	G G
Control	T T	T T	T T	G G	G G	T T	G G	C T	G G	T T	G T	C C	A G	C C	A A	A A	A A	G G
Control	T T	T T	T T	G G	G G	T T	G G	C T	G G	T T	G T	C C	A G	C C	A A	A A	A A	G G
Control	T T	T T	T T	G G	G G	T T	G G	C T	G G	T T	G T	C C	A G	C C	A A	A A	A A	G G
Control	T T	T T	T T	C C	G G	A A	G G	T T	G G	T T	T T	C C	A A	C C	A A	T T	A A	C C
Control	C C	T T	C C	G G	A A	T T	A A	C C	A A	C C	G G	C C	A A	T T	G G	A A	G G	G G
Control	T T	T T	T T	C C	G G	A A	G G	C C	G G	T T	G G	C C	A A	C C	A A	T T	A A	C C
Control	T T	T T	T T	C C	G G	A A	G G	T T	G G	T T	T T	C C	A A	C C	A A	T T	A A	C C
Control	C C	C T	C T	G G	G G	T T	A A	C C	A A	C C	G G	C C	A A	T T	G G	A A	G G	G G
Control	C T	C T	T T	C G	A G	A T	A G	C C	A G	C T	G G	C T	A G	C T	A G	A T	A G	C G
Control	T T	T T	T T	C C	G G	A A	G G	T T	G G	T T	G G	C C	G G	C C	A A	T T	A A	C C
Control	T T	T T	T T	C C	G G	A A	G G	T T	G G	T T	G G	C C	G G	C C	A A	T T	A A	C C
Control	T T	T T	T T	C C	G G	A A	G G	T T	G G	T T	G G	C C	G G	C C	A A	T T	A A	C C
Control	C T	C T	T T	C G	A G	A T	A G	C C	A G	C T	G G	C T	A G	C T	A G	A T	A G	C G
Control	T T	T T	T T	C C	G G	A A	G G	T T	G G	T T	T T	C C	G G	C C	A A	T T	A A	C C
Control	C C	C C	T T	G G	A A	T T	A A	C C	A A	C C	G G	T T	G G	T T	G G	A A	G G	G G
Control	C T	C T	T T	C G	G G	A A	G G	C C	G G	T T	G G	C C	A A	C T	A G	A T	A G	C G
Control	T T	T T	T T	C C	G G	A A	G G	T T	G G	T T	T T	C C	G G	C C	A A	T T	A A	C C
Control	T T	T T	T T	C C	G G	A A	G G	C C	G G	T T	G G	C C	A A	C C	A A	T T	A A	C C
Control	T T	T T	T T	C C	G G	A A	G G	T T	G G	T T	T T	C C	A A	C C	A A	T T	A A	C C
Control	T T	T T	T T	C C	G G	A A	G G	T T	G G	T T	T T	C C	A A	C C	A A	T T	A A	C C
Control	T T	T T	T T	C C	G G	A A	G G	T T	G G	T T	T T	C C	G G	C C	A A	T T	A A	C C
Control	T T	T T	T T	C C	G G	A A	G G	T T	G G	T T	T T	C C	A A	C C	A A	T T	A A	C C
Control	T T	T T	T T	C C	G G	A A	G G	C T	G G	T T	G T	C C	A A	C C	A A	T T	A A	C C
Control	C T	T T	C T	C G	A G	A T	A G	C C	A G	C T	G G	C T	A G	C T	A G	A T	A G	C G
Control	C T	T T	C T	C G	G G	A A	G G	C C	G G	T T	G G	C C	A A	C T	A G	A T	A G	C G
Control	T T	T T	T T	C C	G G	A A	G G	C C	G G	T T	G G	C C	A A	C C	A A	T T	A A	C C
Control	T T	T T	T T	C C	G G	A A	G G	T T	G G	T T	T T	C C	A A	C C	A A	T T	A A	C C
Control	T T	T T	T T	C C	G G	A A	G G	C C	G G	T T	G G	C C	A A	C C	A A	T T	A A	C C
Control	T T	T T	T T	C C	G G	A A	G G	T T	G G	T T	G G	C C	G G	C C	A A	T T	A A	C C
Control	C T	T T	C T	C G	A G	A T	A G	C C	A G	C T	G G	C T	A G	C T	A G	A T	A G	C G
Control	T T	T T	T T	C C	G G	A A	G G	C T	G G	T T	G T	C C	A A	C C	A A	T T	A A	C C
Control	T T	T T	T T	C C	G G	A A	G G	T T	G G	T T	G G	C C	G G	C C	A A	T T	A A	C C
Control	T T	T T	T T	C C	G G	A A	G G	T T	G G	T T	T T	C C	G G	C C	A A	T T	A A	C C
Control	T T	T T	T T	C C	G G	A A	G G	T T	G G	T T	T T	C C	G G	C C	A A	T T	A A	C C
Control	C T	C T	T T	C G	G G	A A	G G	C C	G G	T T	G G	C C	A A	C T	A G	A T	A G	C G
Control	C T	T T	C T	C G	G G	A A	G G	C C	G G	T T	G G	C C	A A	C T	A G	A T	A G	C G
Control	T T	T T	T T	C C	G G	A A	G G	C C	G G	T T	G G	C C	A A	C C	A A	T T	A A	C C
Control	T T	T T	T T	C C	G G	A A	G G	C C	G G	T T	G G	C C	A A	C C	A A	T T	A A	C C
Control	T T	T T	T T	C C	G G	A A	G G	T T	G G	T T	T T	C C	G G	C C	A A	T T	A A	C C
Control	T T	T T	T T	C C	G G	A A	G G	C T	G G	T T	G T	C C	A A	C C	A A	T T	A A	C C
Control	T T	T T	T T	C C	G G	A A	G G	T T	G G	T T	T T	C C	G G	C C	A A	T T	A A	C C
Control	T T	T T	T T	C C	G G	A A	G G	T T	G G	T T	G G	C C	G G	C C	A A	T T	A A	C C
Control	T T	T T	T T	C C	G G	A A	G G	C T	G G	T T	G T	C C	A A	C C	A A	T T	A A	C C
Control	C T	C T	T T	C G	G G	A A	G G	C C	G G	T T	G G	C C	A A	C T	A G	A T	A G	C G
Control	C T	C T	T T	C G	A G	A T	A G	C T	A G	C C	G G	C T	A A	C T	A G	A T	A G	C G
Control	T T	T T	T T	C C	G G	A A	G G	C C	G G	T T	G G	C C	A A	C C	A A	A T	A A	C C
Control	C C	C T	C T	G G	A A	T T	A A	C C	A A	C C	G G	T T	G G	T T	G G	A A	G G	G G
Control	T T	T T	T T	C C	G G	A A	G G	T T	G G	T T	T T	C C	G G	C C	A A	T T	A A	C C
Control	T T	T T	T T	C C	G G	A A	G G	C C	G G	T T	G G	C C	A A	C C	A A	T T	A A	C C
